# Supplementary material for: What is kangaroo mother care? Systematic review of the literature
Source: PubMed Central journal article supplement (PMC4871067; doi:10.7189/jogh.06.010701), 2016-06
Supplement: jogh-06-010701-s001.pdf [file jogh-06-010701-s001.pdf]

# Online Supplementary Document

Chan et al. What is kangaroo mother care? Systematic review of the literature

J Glob Health 2016;6:010701

**Table S1. Studies included in the kangaroo mother care definition systematic review (N=299), 2014**

| Author       | Year | Title                                                                                                                | Country | Study design                                | Sample size  | Newborns Characteristics | KMC components | Onset of SSC                         | Stability criteria for KMC initiation | Hours per day of KMC provision* | # of days of KMC provision* | Discharge criteria for Kangarooed baby | Follow-up duration | Follow-up location |
|--------------|------|----------------------------------------------------------------------------------------------------------------------|---------|---------------------------------------------|--------------|--------------------------|----------------|--------------------------------------|---------------------------------------|---------------------------------|-----------------------------|----------------------------------------|--------------------|--------------------|
| Abouelfettoh | 2011 | Effect of skin-to-skin contact on preterm infant skin barrier function and hospital-acquired infection               | USA     | Pre-post                                    | 10 Dyads     | 28-30 weeks              | SSC            | N/A                                  | N/A                                   | ≥1                              | 5                           | N/A                                    | N/A                | N/A                |
| Abul-Fadl    | 2012 | Evaluation of mothers' knowledge, attitudes, and practice towards the ten steps to successful breastfeeding in Egypt | Egypt   | Pop based surveillance, facility evaluation | 1052 Mothers | All ages                 | SSC            | N/A                                  | N/A                                   | N/A                             | N/A                         | N/A                                    | N/A                | N/A                |
| Abul-Fadl    | 2011 | Breastfeeding and skin-to-skin care in congenital heart disease with heart failure                                   | Egypt   | Focus group/ interview                      | 1052 Mothers | <24 mon.                 | N/A            | N/A                                  | N/A                                   | N/A                             | N/A                         | N/A                                    | N/A                | N/A                |
| Acharya      | 2014 | Randomized control trial of Kangaroo Mother Care in low birth weight babies at a tertiary level hospital             | Nepal   | RCT                                         | 126 Newborns | <2000g                   | N/A            | Once both baby and mother were ready | N/A                                   | ≥6                              | N/A                         | N/A                                    | N/A                | N/A                |

| Author      | Year | Title                                                                                                                       | Country | Study design         | Sample size  | Newborns Characteristics | KMC components | Onset of SSC                  | Stability criteria for KMC initiation | Hours per day of KMC provision* | # of days of KMC provision* | Discharge criteria for Kangarooed baby | Follow-up duration | Follow-up location |
|-------------|------|-----------------------------------------------------------------------------------------------------------------------------|---------|----------------------|--------------|--------------------------|----------------|-------------------------------|---------------------------------------|---------------------------------|-----------------------------|----------------------------------------|--------------------|--------------------|
| Acosta Díaz | 2003 | Kangaroo mother care method. Clinical and humoral assessment during the first year of corrected age                         | Cuba    | Intervention         | 120 Newborns | Premature: N/A cutoff    | SSC            | N/A                           | N/A                                   | N/A                             | N/A                         | N/A                                    | At 3 and 6 mon. GA | N/A                |
| Acosta Díaz | 2003 | Kangaroo mother care method. Evaluation of the neuro-development at first year of corrected age                             | Cuba    | Intervention         | 120 Newborns | Premature: N/A cutoff    | SSC            | N/A                           | N/A                                   | N/A                             | N/A                         | N/A                                    | At 3 and 6 mon. GA | N/A                |
| Acosta Díaz | 2003 | Kangaroo mother care method. Impact on the physical and intellectual development at preschool age                           | Cuba    | Retrospective cohort | 100 Newborns | Premature: N/A cutoff    | SSC            | Immediately after birth       | N/A                                   | N/A                             | N/A                         | N/A                                    | N/A                | N/A                |
| Acuna-Muga  | 2013 | Volume of milk obtained in relation to location and circumstances of expression in mothers of very low birth weight infants | Spain   | Intervention         | 26 Dyads     | VLBW: N/A cutoff         | N/A            | After mother was eligible     | N/A                                   | ≥2                              | ≥5                          | N/A                                    | N/A                | N/A                |
| Aghdas      | 2014 | Effect of immediate and continuous mother-infant skin-to-skin contact on breastfeeding self-efficacy of primiparous         | Iran    | RCT                  | 92 Mothers   | ≥37 weeks, 2500-4000g    | SSC            | Once eligible: N/A definition | N/A                                   | ≥2                              | N/A                         | N/A                                    | N/A                | N/A                |

| Author | Year | Title                                                                                                                     | Country     | Study design       | Sample size  | Newborns Characteristics | KMC components | Onset of SSC                                  | Stability criteria for KMC initiation | Hours per day of KMC provision* | # of days of KMC provision* | Discharge criteria for Kangarooed baby                                                                         | Follow-up duration | Follow-up location |
|--------|------|---------------------------------------------------------------------------------------------------------------------------|-------------|--------------------|--------------|--------------------------|----------------|-----------------------------------------------|---------------------------------------|---------------------------------|-----------------------------|----------------------------------------------------------------------------------------------------------------|--------------------|--------------------|
|        |      | women: A randomized control trial                                                                                         |             |                    |              |                          |                |                                               |                                       |                                 |                             |                                                                                                                |                    |                    |
| Ahmed  | 2011 | Community Kangaroo Mother Care: implementation and potential for neonatal survival and health in very low-income settings | Bangladesh  | Prospective cohort | 4165 Dyads   | All ages                 | SSC, EBF, FU   | N/A                                           | N/A                                   | N/A                             | N/A                         | N/A                                                                                                            | N/A                | Home               |
| Ahn    | 2010 | Kangaroo care on premature infant growth and maternal attachment and post-partum depression in South Korea                | South Korea | Prospective Cohort | 20 Dyads     | <36 weeks, <1800g        | N/A            | N/A                                           | N/A                                   | ≥1                              | 21                          | N/A                                                                                                            | N/A                | N/A                |
| Akcan  | 2009 | The effect of kangaroo care on pain in premature infants during invasive procedures                                       | Turkey      | RCT                | 50 Newborns  | 26-36 PMA, LBW           | SSC            | N/A                                           | N/A                                   | 0.75                            | 5                           | N/A                                                                                                            | N/A                | N/A                |
| Ali    | 2009 | Kangaroo mother care as compared to conventional care for low birth weight babies                                         | India       | RCT                | 114 Newborns | 1200-1800g               | SSC            | As soon as baby hemodynamically became stable | The same as SSC onset criteria        | ≥4-6                            | N/A                         | Weight gain for at least 3 consecutive days, no overt illness, no IV medications and on exclusive breast feeds | N/A                | N/A                |











| Author    | Year | Title                                                                                                                                                       | Country      | Study design        | Sample size   | Newborns Characteristics | KMC components | Onset of SSC                                                                                                                     | Stability criteria for KMC initiation | Hours per day of KMC provision* | # of days of KMC provision* | Discharge criteria for Kangarooed baby | Follow-up duration | Follow-up location |
|-----------|------|-------------------------------------------------------------------------------------------------------------------------------------------------------------|--------------|---------------------|---------------|--------------------------|----------------|----------------------------------------------------------------------------------------------------------------------------------|---------------------------------------|---------------------------------|-----------------------------|----------------------------------------|--------------------|--------------------|
| Bergh**   | 2012 | Evaluation OF Kangaroo Mother Care Services in Rwanda                                                                                                       | Rwanda       | Facility evaluation | 7 Facilities  | N/A                      | N/A            | N/A                                                                                                                              | N/A                                   | N/A                             | N/A                         | N/A                                    | N/A                | N/A                |
| Bergh**   | 2012 | Evaluation OF Kangaroo Mother Care Services in Uganda                                                                                                       | Uganda       | Facility evaluation | 11 Facilities | N/A                      | N/A            | N/A                                                                                                                              | N/A                                   | N/A                             | N/A                         | N/A                                    | N/A                | N/A                |
| Bergman   | 2004 | Randomized controlled trial of skin-to-skin contact from birth versus conventional incubator for physiological stabilization in 1200- to 2199-gram newborns | South Africa | RCT                 | 35 Dyads      | 1200-2199g               | SSC            | After infant dried and assessed for anomalies, resuscitated if needed, and given eye prophylaxis and vit K injection and weighed | No need to resuscitate                | 6                               | 1                           | N/A                                    | N/A                | N/A                |
| Bergman   | 1994 | The 'kangaroo-method' for treating low birth weight babies in a developing country                                                                          | Mozambique   | Chart review        | 126 Newborns  | <2000g                   | SSC, EBF       | After drying                                                                                                                     | N/A                                   | N/A                             | N/A                         | At 2500 g and breast fed only          | N/A                | N/A                |
| Bergstrom | 2007 | Immediate maternal thermal response to skin-to-skin care of newborn                                                                                         | Uganda       | Pre-post            | 39 Dyads      | Non LBW                  | SSC            | Immediately after birth                                                                                                          | N/A                                   | 0.5-1                           | 1                           | N/A                                    | N/A                | N/A                |
| Bier      | 1996 | Comparison of skin-to-skin contact with standard contact in low-birth-weight in-                                                                            | Colombia     | RCT                 | 50/ Dyads     | <1500g                   | SSC, EBF       | N/A                                                                                                                              | N/A                                   | N/A                             | ≤10                         | N/A                                    | N/A                | N/A                |

| Author   | Year | Title                                                                                                                                             | Country      | Study design                              | Sample size    | Newborns Characteristics | KMC components | Onset of SSC                  | Stability criteria for KMC initiation  | Hours per day of KMC provision*        | # of days of KMC provision* | Discharge criteria for Kangarooed baby                                                                                                             | Follow-up duration                                        | Follow-up location       |
|----------|------|---------------------------------------------------------------------------------------------------------------------------------------------------|--------------|-------------------------------------------|----------------|--------------------------|----------------|-------------------------------|----------------------------------------|----------------------------------------|-----------------------------|----------------------------------------------------------------------------------------------------------------------------------------------------|-----------------------------------------------------------|--------------------------|
|          |      | fants who are breast-fed                                                                                                                          |              |                                           |                |                          |                |                               |                                        |                                        |                             |                                                                                                                                                    |                                                           |                          |
| Bigelow  | 2012 | Effect of Mother/Infant Skin-to-Skin Contact on Postpartum Depressive Symptoms and Maternal Physiological Stress                                  | Canada       | Intervention                              | 90 Mothers     | Full term                | SSC            | N/A                           | N/A                                    | 6 in first week, 2 until 1 mon. of age | 30                          | N/A                                                                                                                                                | N/A                                                       | N/A                      |
| Bigelow  | 2010 | The relation between early mother-infant skin-to-skin contact and later maternal sensitivity in South African mothers of low birth weight infants | South Africa | RCT, chart review, Focus group/ interview | 12 Dyads       | 1385-2199                | SSC            | Immediately after birth       | N/A                                    | N/A                                    | N/A                         | N/A                                                                                                                                                | N/A                                                       | Home                     |
| Blay**   | 2009 | Ghana KMC Study Results                                                                                                                           | Ghana        | Chart review                              | 12953 Newborns | All ages, 1000-2000g     | N/A            | N/A                           | N/A                                    | N/A                                    | N/A                         | N/A                                                                                                                                                | N/A                                                       | N/A                      |
| Blencowe | 2009 | Safety, effectiveness and barriers to follow-up using an 'early discharge' Kangaroo Care policy in a resource poor setting                        | Malawi       | Prospective Cohort                        | 272 Newborns   | <2000g                   | N/A            | Once eligible: N/A definition | After initial stabilization in nursery | N/A                                    | N/A                         | Weight >1300g and gaining weight for 3 days, maintain stable temperature (36-37.5 degrees C), able to breastfeed or cup feed expressed breast milk | Fortnightly until weight 2000g, then 3-weekly until 2500g | Home and health facility |

| Author    | Year | Title                                                                                        | Country | Study design           | Sample size            | Newborns Characteristics   | KMC components   | Onset of SSC                  | Stability criteria for KMC initiation  | Hours per day of KMC provision* | # of days of KMC provision* | Discharge criteria for Kangarooed baby                                      | Follow-up duration        | Follow-up location |
|-----------|------|----------------------------------------------------------------------------------------------|---------|------------------------|------------------------|----------------------------|------------------|-------------------------------|----------------------------------------|---------------------------------|-----------------------------|-----------------------------------------------------------------------------|---------------------------|--------------------|
| Blencowe  | 2005 | Setting up Kangaroo Mother Care at Queen Elizabeth Hospital, Blantyre - A practical approach | Malawi  | Facility evaluation    | 1 Facility             | <2000g                     | SSC, EBF, DC, FU | N/A                           | Stable, non-sick                       | N/A                             | N/A                         | Established breast or cup feeding , free of serious illness, weight > 1500g | N/A                       | Health facility    |
| Blomqvist | 2013 | Initiation and extent of skin-to-skin care at two Swedish neonatal intensive care units      | Sweden  | Focus group/ interview | 104 Newborns           | 27-33 weeks                | SSC, DC, FU      | N/A                           | N/A                                    | N/A                             | N/A                         | N/A                                                                         | At 34-35 weeks PMA        | N/A                |
| Blomqvist | 2013 | Provision of Kangaroo Mother Care: supportive factors and barriers perceived by parents      | Sweden  | Focus group/ interview | 76 Mothers, 74 Fathers | 28-33 weeks, 740-2920g     | SSC              | N/A                           | Without any life threatening illnesses | N/A                             | N/A                         | N/A                                                                         | 1-2 weeks after discharge | Home by letter     |
| Blomqvist | 2011 | Swedish mothers' experience of continuous Kangaroo Mother Care                               | Sweden  | Focus group/ interview | 23 Dyads               | All ages                   | SSC, EBF         | N/A                           | N/A                                    | N/A                             | N/A                         | N/A                                                                         | N/A                       | N/A                |
| Blomqvist | 2010 | Parent-infant skin-to-skin contact; How do parent records compare to nurse records?          | Sweden  | Prospective Cohort     | 20 Parents             | All ages                   | N/A              | N/A                           | N/A                                    | N/A                             | N/A                         | N/A                                                                         | N/A                       | N/A                |
| Bohnhorst | 2004 | Bradycardia and desaturation during skin-to-skin care: no relationship to hyperthermia       | Germany | Pre-post               | 22 Newborns            | <32 weeks, LBW: N/A cutoff | SSC              | Once eligible: N/A definition | After measurement in incubator         | 2                               | 1                           | N/A                                                                         | N/A                       | N/A                |

| Author    | Year | Title                                                                                                                                                      | Country  | Study design       | Sample size | Newborns Characteristics | KMC components | Onset of SSC                  | Stability criteria for KMC initiation                   | Hours per day of KMC provision* | # of days of KMC provision* | Discharge criteria for Kangarooed baby                                                                                                                    | Follow-up duration | Follow-up location |
|-----------|------|------------------------------------------------------------------------------------------------------------------------------------------------------------|----------|--------------------|-------------|--------------------------|----------------|-------------------------------|---------------------------------------------------------|---------------------------------|-----------------------------|-----------------------------------------------------------------------------------------------------------------------------------------------------------|--------------------|--------------------|
| Bohnhorst | 2001 | Skin-to-skin (kangaroo) care, respiratory control, and thermoregulation                                                                                    | Germany  | Pre-post           | 22 Newborns | <32 weeks                | SSC            | Once eligible: N/A definition | After outcome measurement in incubator                  | 2                               | 1                           | N/A                                                                                                                                                       | N/A                | N/A                |
| Boju      | 2012 | Short spell kangaroo mother care and its differential physiological influence in subgroups of preterm babies                                               | India    | Pre-post           | 86 Newborns | <37 weeks                | N/A            | N/A                           | N/A                                                     | 1                               | 1                           | N/A                                                                                                                                                       | N/A                | N/A                |
| Boo       | 2007 | Short duration of skin-to-skin contact: Effects on growth and breastfeeding                                                                                | Malaysia | RCT                | 126 Dyads   | <1501g                   | SSC            | Once eligible: N/A definition | Stable condition after adaptation to extra-uterine life | 1                               | 10                          | Clinically well, weighed $\geq 1750g$ , tolerate oral feed, weight gain at 10g/day, no apnea or bradycardia or desaturation for $\geq 5$ consecutive days | N/A                | N/A                |
| Bosque    | 1995 | Physiologic measures of kangaroo versus incubator care in a tertiary-level nursery                                                                         | USA      | Prospective Cohort | 8 Dyads     | All ages                 | SSC            | Once eligible: N/A definition | N/A                                                     | 4                               | 21                          | N/A                                                                                                                                                       | N/A                | N/A                |
| Bramson   | 2010 | Effect of early skin-to-skin mother-infant contact during the first 3 hours following birth on exclusive breastfeeding during the maternity hospital stay. | USA      | Prospective Cohort | 21842 Dyads | Full term                | SSC, EBF       | Immediately after birth       | N/A                                                     | 3                               | 1                           | N/A                                                                                                                                                       | N/A                | N/A                |

| Author     | Year | Title                                                                                                                       | Country   | Study design           | Sample size             | Newborns Characteristics | KMC components | Onset of SSC            | Stability criteria for KMC initiation | Hours per day of KMC provision* | # of days of KMC provision* | Discharge criteria for Kangarooed baby | Follow-up duration        | Follow-up location |
|------------|------|-----------------------------------------------------------------------------------------------------------------------------|-----------|------------------------|-------------------------|--------------------------|----------------|-------------------------|---------------------------------------|---------------------------------|-----------------------------|----------------------------------------|---------------------------|--------------------|
| Brimdyr    | 2012 | A Realistic Evaluation of Two Training Programs on Implementing Skin-to-Skin as a Standard of Care                          | Egypt     | Focus group/ interview | 40 Nurses and CHWs      | N/A                      | SSC            | Immediately after birth | N/A                                   | 1                               | 1                           | N/A                                    | N/A                       | N/A                |
| Broughton  | 2013 | The cost-savings of implementing kangaroo mother care in Nicaragua                                                          | Nicaragua | Chart review           | 98 Charts in a Facility | <37 weeks, <2500g        | SSC, EBF, DC   | N/A                     | N/A                                   | N/A                             | N/A                         | N/A                                    | N/A                       | N/A                |
| Byaruhanga | 2008 | Perceptions among post-delivery mothers of skin-to-skin contact and newborn baby care in a periurban hospital in Uganda.    | Uganda    | Focus group/ interview | 30 Mothers              | All ages                 | SSC            | Immediately after birth | N/A                                   | N/A                             | N/A                         | N/A                                    | N/A                       | N/A                |
| Bystrova   | 2009 | Early Contact versus Separation: Effects on Mother-Infant Interaction One Year Later                                        | Russia    | RCT                    | 124 Dyads               | Full term                | SSC, EBF, FU   | Immediately after birth | N/A                                   | 2                               | 1                           | N/A                                    | 1,2,3,4,5,6, 9,12 mon. GA | Home               |
| Bystrova   | 2007 | The effect of Russian Maternity Home routines on breastfeeding and neonatal weight loss with special reference to swaddling | Russia    | RCT                    | 153 Dyads               | All ages                 | SSC            | Immediately after birth | N/A                                   | N/A                             | N/A                         | N/A                                    | N/A                       | N/A                |

| Author    | Year | Title                                                                                                                               | Country        | Study design           | Sample size              | Newborns Characteristics         | KMC components | Onset of SSC            | Stability criteria for KMC initiation                                                                                                       | Hours per day of KMC provision* | # of days of KMC provision* | Discharge criteria for Kangarooed baby | Follow-up duration             | Follow-up location |
|-----------|------|-------------------------------------------------------------------------------------------------------------------------------------|----------------|------------------------|--------------------------|----------------------------------|----------------|-------------------------|---------------------------------------------------------------------------------------------------------------------------------------------|---------------------------------|-----------------------------|----------------------------------------|--------------------------------|--------------------|
| Calais    | 2010 | Skin-to-skin contact of fullterm infants: an explorative study of promoting and hindering factors in two Nordic childbirth settings | Sweden, Norway | Focus group/ interview | 117 Mothers, 107 Fathers | Full term                        | SSC, DC, FU    | Immediately after birth | N/A                                                                                                                                         | N/A                             | N/A                         | Within 6-8 hours after birth           | 2 weeks after discharge        | Home               |
| Carbasse  | 2013 | Safety and Effectiveness of Skin-to-Skin Contact in the NICU to Support Neurodevelopment in Vulnerable Preterm Infants              | France         | Pre-post               | 96 Newborns              | <33 weeks                        | SSC            | N/A                     | FiO2 <0.50, set ventilator respiratory rate <50 per min, no major respiratory event or requiring medical interventions in previous 12 hours | N/A                             | N/A                         | N/A                                    | N/A                            | N/A                |
| Carbonell | 2010 | Quality of maternal care: a comparison of preterm infants in Kangaroo mother care and full-term infants in regular care             | Colombia       | Intervention           | 93 Dyads                 | Premature: N/A cutoff, Full term | SSC, EBF, FU   | Immediately after birth | No grave health state                                                                                                                       | N/A                             | N/A                         | LBW babies had to weigh 2400 g         | 3,7 mon.                       | Home               |
| Carfoot   | 2005 | A randomised controlled trial in the north of England examining the effects of skin-to-skin care on breast feeding                  | UK             | RCT                    | 204 Dyads                | All ages                         | SSC, EBF, FU   | Immediately after birth | N/A                                                                                                                                         | N/A                             | N/A                         | N/A                                    | 2 week, 4 mon. after discharge | Home               |

| Author            | Year | Title                                                                                                                          | Country                     | Study design           | Sample size   | Newborns Characteristics | KMC components | Onset of SSC                    | Stability criteria for KMC initiation | Hours per day of KMC provision* | # of days of KMC provision* | Discharge criteria for Kangarooed baby                                                                | Follow-up duration           | Follow-up location |
|-------------------|------|--------------------------------------------------------------------------------------------------------------------------------|-----------------------------|------------------------|---------------|--------------------------|----------------|---------------------------------|---------------------------------------|---------------------------------|-----------------------------|-------------------------------------------------------------------------------------------------------|------------------------------|--------------------|
| Carfoot           | 2004 | The value of a pilot study in breast-feeding research                                                                          | UK                          | RCT                    | 28 Mothers    | ≥36 weeks                | SSC            | Immediately after birth         | N/A                                   | N/A                             | N/A                         | N/A                                                                                                   | N/A                          | N/A                |
| Castiblanco López | 2011 | Vision of mothers in care of premature babies at home                                                                          | Colombia                    | Focus group/ interview | 8 Mothers     | <36 weeks, 2320g         | N/A            | N/A                             | N/A                                   | N/A                             | N/A                         | N/A                                                                                                   | N/A                          | N/A                |
| Castral           | 2008 | The effects of skin-to-skin contact during acute pain in pre-term newborns                                                     | Brazil                      | RCT                    | 59 Newborns   | 30-<37 weeks             | SSC            | After 2min of baseline readings | N/A                                   | 0.283                           | 1                           | N/A                                                                                                   | N/A                          | N/A                |
| Cattaneo          | 1998 | Kangaroo mother care for low birth weight infants: a randomized controlled trial in different settings                         | Mexico, Indonesia, Ethiopia | RCT                    | 7354 Newborns | 1000-1999g               | SSC,EBF,FU     | Immediately after birth         | N/A                                   | 20; mean                        | N/A                         | Indonesia; infants reaches 1500, weight gain, stable temperature for 3 days (N/A for other hospitals) | 3,10,20, 30 d post discharge | Home               |
| Chapak            | 1997 | Kangaroo mother versus traditional care for newborn infants (less than or equal to) 2000 grams: A randomized, controlled trial | Colombia                    | RCT                    | 746 Newborns  | <2000g                   | SSC, EBF,DC,FU | Once eligible: N/A definition   | N/A                                   | N/A                             | N/A                         | Regardless of weight or GA as soon as they medically stable and can suck swallow and breath           | N/A                          | Home               |



| Author       | Year | Title                                                                                                                          | Country | Study design | Sample size | Newborns Characteristics | KMC components | Onset of SSC | Stability criteria for KMC initiation | Hours per day of KMC provision* | # of days of KMC provision* | Discharge criteria for Kangarooed baby | Follow-up duration       | Follow-up location |
|--------------|------|--------------------------------------------------------------------------------------------------------------------------------|---------|--------------|-------------|--------------------------|----------------|--------------|---------------------------------------|---------------------------------|-----------------------------|----------------------------------------|--------------------------|--------------------|
| Chidambaram  | 2013 | Effect of Kangaroo mother care in reducing pain due to heel prick among pre-term neonates: a crossover trial                   | India   | Crossover    | 50 Newborns | 32-36 weeks, <2500g      | SSC            | N/A          | N/A                                   | ≥0.25                           | 1                           | N/A                                    | N/A                      | N/A                |
| Chiu         | 2009 | Effect of early skin-to-skin contact on mother-preterm infant interaction through 18 months: Randomized controlled trial       | USA     | RCT          | 100 Dyads   | Premature: N/A cutoff    | SSC            | N/A          | N/A                                   | N/A                             | N/A                         | N/A                                    | At 6, 12, and 18 mon. GA | Health facility    |
| Christensson | 1998 | Randomized study of skin-to-skin versus incubator care for rewarming low-risk hypothermic neonates                             | Zambia  | RCT          | 80 Newborns | ≥1500g                   | SSC            | N/A          | N/A                                   | N/A                             | N/A                         | N/A                                    | N/A                      | N/A                |
| Chwo         | 2002 | A randomized controlled trial of early kangaroo care for preterm infants: effects on temperature, weight, behavior, and acuity | Taiwan  | RCT          | 34 Dyads    | 32-36 weeks              | SSC            | N/A          | N/A                                   | 1                               | 6                           | N/A                                    | N/A                      | N/A                |

| Author         | Year | Title                                                                                                                 | Country | Study design           | Sample size   | Newborns Characteristics | KMC components | Onset of SSC                                | Stability criteria for KMC initiation | Hours per day of KMC provision* | # of days of KMC provision* | Discharge criteria for Kangarooed baby | Follow-up duration                          | Follow-up location |
|----------------|------|-----------------------------------------------------------------------------------------------------------------------|---------|------------------------|---------------|--------------------------|----------------|---------------------------------------------|---------------------------------------|---------------------------------|-----------------------------|----------------------------------------|---------------------------------------------|--------------------|
| Colameo        | 2006 | Kangaroo Mother Care in public hospitals in the State of Sao Paulo, Brazil: an analysis of the implementation process | Brazil  | Cross sectional        | 28 Facilities | LBW: N/A cutoff          | N/A            | Once eligible: N/A definition               | N/A                                   | N/A                             | N/A                         | Clinical stability and weight of 2000g | Once in two or three days until reach 2500g | Health facility    |
| Collados-Gomez | 2011 | Assessing the impact of kangaroo care on preterm infant stress                                                        | Spain   | Chart review, pre-post | 51 Newborns   | 29-34 weeks PMA          | N/A            | N/A                                         | N/A                                   | ≥0.5                            | 1                           | N/A                                    | N/A                                         | N/A                |
| Cong           | 2012 | Effects of skin-to-skin contact on autonomic pain responses in preterm infants                                        | USA     | Randomized cross-over  | 26 Dyads      | 28-<33 weeks             | SSC            | N/A                                         | N/A                                   | 0.25-0.5                        | N/A                         | N/A                                    | N/A                                         | N/A                |
| Cong           | 2009 | Kangaroo Care modifies preterm infant heart rate variability in response to heel stick pain: pilot study              | USA     | Randomized cross-over  | 14 Dyads      | 30-32 weeks              | SSC            | After a NG tube or completed bottle feeding | N/A                                   | 1.5                             | 1                           | N/A                                    | N/A                                         | N/A                |
| Cong           | 2011 | Randomized crossover trial of kangaroo care to reduce biobehavioral pain responses in preterm infants: a pilot study  | USA     | Randomized cross-over  | 28 Newborns   | 30-32 weeks, 2-9 days GA | SSC            | 80 minutes before heel sticking procedure   | N/A                                   | 1                               | 1                           | N/A                                    | N/A                                         | N/A                |
| Constantinou   | 1999 | Effects of skin-to-skin holding on general movements of preterm                                                       | USA     | Pre-post               | 10 Newborns   | 33-36 weeks, <2000g      | SSC            | After the first feeding of the day shift    | N/A                                   | N/A                             | 1                           | N/A                                    | N/A                                         | N/A                |

| Author      | Year | Title                                                                                                                                                                              | Country  | Study design       | Sample size            | Newborns Characteristics   | KMC components | Onset of SSC                  | Stability criteria for KMC initiation                          | Hours per day of KMC provision* | # of days of KMC provision* | Discharge criteria for Kangarooed baby | Follow-up duration | Follow-up location |
|-------------|------|------------------------------------------------------------------------------------------------------------------------------------------------------------------------------------|----------|--------------------|------------------------|----------------------------|----------------|-------------------------------|----------------------------------------------------------------|---------------------------------|-----------------------------|----------------------------------------|--------------------|--------------------|
|             |      | infants                                                                                                                                                                            |          |                    |                        |                            |                |                               |                                                                |                                 |                             |                                        |                    |                    |
| Crenshaw    | 2012 | Use of a video-ethnographic intervention (PRECESS Immersion Method) to improve skin-to-skin care and breastfeeding rates                                                           | USA      | Descriptive        | 261 Dyads, N/A for HCP | Full term                  | SSC            | ≤2min after birth             | Healthcare provider determined if eligible for SSC after birth | N/A                             | 1                           | N/A                                    | N/A                | N/A                |
| Cruvinel    | 2007 | Interaction between mothers and pre-term infants and mood changes: a comparison between the Kangaroo Mother Method and those observed on a visit to a Neonatal Intensive Care Unit | Brazil   | Prospective Cohort | 60 Mothers             | <37 weeks, LBW: N/A cutoff | SSC,EBF        | Once eligible: N/A definition | N/A                                                            | N/A                             | N/A                         | N/A                                    | N/A                | N/A                |
| Dageville   | 2008 | Very early neonatal apparent life-threatening events and sudden unexpected deaths: Incidence and risk factors                                                                      | France   | Case control       | 62968 Newborns         | >36 weeks                  | SSC            | N/A                           | N/A                                                            | N/A                             | N/A                         | N/A                                    | N/A                | N/A                |
| Dala Sierra | 1994 | Experience Madre Kangaroo; Kangaroo mother experi-                                                                                                                                 | Honduras | RCT                | 20 Newborns            | <2000g                     | N/A            | Immediately after birth       | N/A                                                            | N/A                             | N/A                         | N/A                                    | N/A                | N/A                |





| Author     | Year | Title                                                                                                                                                   | Country | Study design       | Sample size            | Newborns Characteristics | KMC components | Onset of SSC                  | Stability criteria for KMC initiation                              | Hours per day of KMC provision* | # of days of KMC provision* | Discharge criteria for Kangarooed baby | Follow-up duration                           | Follow-up location       |
|------------|------|---------------------------------------------------------------------------------------------------------------------------------------------------------|---------|--------------------|------------------------|--------------------------|----------------|-------------------------------|--------------------------------------------------------------------|---------------------------------|-----------------------------|----------------------------------------|----------------------------------------------|--------------------------|
|            |      | perceptions                                                                                                                                             |         |                    |                        |                          |                |                               |                                                                    |                                 |                             |                                        |                                              |                          |
| Entringer  | 2013 | Budget impact of using the Kangaroo Method in neonatal care                                                                                             | Brazil  | Chart review       | 1000 Newborns          | >1250g                   | N/A            | N/A                           | N/A                                                                | N/A                             | N/A                         | N/A                                    | N/A                                          | N/A                      |
| Erlandsson | 2007 | Skin-to-skin care with the father after cesarean birth and its effect on newborn crying and prefeeding behavior                                         | Sweden  | RCT                | 29 Father infant dyads | 37-41 weeks, C-Section   | SSC            | Immediately after birth       | N/A                                                                | N/A                             | 1                           | N/A                                    | N/A                                          | N/A                      |
| Feldman    | 2002 | Comparison of skin-to-skin (kangaroo) and traditional care: parenting outcomes and preterm infant development                                           | Israel  | Prospective cohort | 146 Dyads              | <1720g, <34 weeks        | SSC            | Once eligible: N/A definition | When medical situation stabilized and no longer needed ventilation | ≥1                              | 14                          | N/A                                    | 3 mon. CA at home, and 6 mon. CA at hospital | Home                     |
| Feldman    | 2002 | Skin-to-Skin contact (Kangaroo care) promotes self-regulation in premature infants: sleep-wake cyclicity, arousal modulation, and sustained exploration | Israel  | Prospective Cohort | 146 Newborns           | <1720g, <34 weeks        | SSC            | Once eligible: N/A definition | When medical situation stabilized, no longer needed ventilation    | ≥1                              | 14                          | N/A                                    | 3 mon. of CA at home, 6 mon. CA at hospital  | Home and health facility |



| Author     | Year | Title                                                                                                                                      | Country | Study design           | Sample size           | Newborns Characteristics | KMC components | Onset of SSC                   | Stability criteria for KMC initiation | Hours per day of KMC provision* | # of days of KMC provision* | Discharge criteria for Kangarooed baby | Follow-up duration        | Follow-up location |
|------------|------|--------------------------------------------------------------------------------------------------------------------------------------------|---------|------------------------|-----------------------|--------------------------|----------------|--------------------------------|---------------------------------------|---------------------------------|-----------------------------|----------------------------------------|---------------------------|--------------------|
|            |      | trial                                                                                                                                      |         |                        |                       |                          |                |                                |                                       |                                 |                             |                                        |                           |                    |
| Ferber     | 2008 | Neurobehavioural assessment of skin-to-skin effects on reaction to pain in pre-term infants: a randomized, controlled within-subject trial | Israel  | RCT                    | 30 Newborns           | 28-34 weeks              | SSC            | 10 min before blood test stick | N/A                                   | N/A                             | N/A                         | N/A                                    | N/A                       | N/A                |
| Ferrarello | 2014 | Barriers to skin-to-skin care during the postpartum stay                                                                                   | USA     | Focus group/ interview | 15 Mothers, 14 Nurses | N/A                      | SSC            | N/A                            | N/A                                   | N/A                             | N/A                         | N/A                                    | N/A                       | N/A                |
| Fischer    | 1998 | Cardiorespiratory stability of premature boys and girls during kangaroo care                                                               | USA     | Pre-post               | 20 Newborns           | 25-32 weeks, <1610g      | SSC            | N/A                            | N/A                                   | 2                               | 1                           | N/A                                    | N/A                       | N/A                |
| Flacking   | 2011 | Positive effect of kangaroo mother care on long-term breastfeeding in very preterm infants                                                 | Sweden  | Prospective Cohort     | 300 Newborns          | <37 weeks                | SSC            | N/A                            | N/A                                   | N/A                             | N/A                         | N/A                                    | 1,2,5,6 mon. of infant CA | Home               |



| Author     | Year | Title                                                                                                                                                         | Country | Study design                     | Sample size    | Newborns Characteristics          | KMC components | Onset of SSC                  | Stability criteria for KMC initiation | Hours per day of KMC provision* | # of days of KMC provision* | Discharge criteria for Kangarooed baby                    | Follow-up duration | Follow-up location |
|------------|------|---------------------------------------------------------------------------------------------------------------------------------------------------------------|---------|----------------------------------|----------------|-----------------------------------|----------------|-------------------------------|---------------------------------------|---------------------------------|-----------------------------|-----------------------------------------------------------|--------------------|--------------------|
| Gathwala   | 2010 | Effect of Kangaroo Mother Care on physical growth, breastfeeding and its acceptability                                                                        | India   | RCT                              | 110 Dyads      | <1800g                            | SSC            | N/A                           | Cardio-pulmonary stability            | ≥6                              | N/A                         | N/A                                                       | 3 mon. GA          | Home               |
| Gathwala   | 2008 | KMC facilitates mother baby attachment in low birth weight infants                                                                                            | India   | RCT                              | 110 Dyads      | ≤1800g                            | SSC            | N/A                           | Cardio-pulmonary stability            | ≥6                              | N/A                         | N/A                                                       | 3 mon. GA          | Home               |
| Ghavane    | 2012 | Kangaroo Mother Care in Kangaroo ward for improving the growth and breastfeeding outcomes when reaching term gestational age in very low birth weight infants | India   | RCT                              | 149 Newborns   | 1500g                             | SSC,EBF,DC, FU | Once transferred to KMC ward  | N/A                                   | 8                               | N/A                         | ≥ 1300g or weight gain at ≥10g/day for 3 consecutive days | 40 weeks GA        | N/A                |
| Gomez Papi | 1998 | [Kangaroo method in delivery room for full-term babies]                                                                                                       | Spain   | Prospective cohort, chart review | 533 Dyads      | Full term and delivered vaginally | SSC,EBF        | Immediately after birth       | N/A                                   | ≤2                              | 1                           | N/A                                                       | N/A                | N/A                |
| Gontijo    | 2010 | Evaluation of implementation of humanized care to low weight newborns: the Kangaroo Method                                                                    | Brazil  | Facility evaluation              | 293 Facilities | N/A                               | SSC,EBF        | Once eligible: N/A definition | Stable clinical condition             | N/A                             | N/A                         | N/A                                                       | N/A                | N/A                |

| Author      | Year | Title                                                                                                                     | Country | Study design           | Sample size    | Newborns Characteristics | KMC components | Onset of SSC                | Stability criteria for KMC initiation | Hours per day of KMC provision* | # of days of KMC provision* | Discharge criteria for Kangarooed baby                                                                          | Follow-up duration | Follow-up location |
|-------------|------|---------------------------------------------------------------------------------------------------------------------------|---------|------------------------|----------------|--------------------------|----------------|-----------------------------|---------------------------------------|---------------------------------|-----------------------------|-----------------------------------------------------------------------------------------------------------------|--------------------|--------------------|
| Gontijo     | 2012 | Evaluation of the implementation of Kangaroo Care by health administrators, professionals, and mothers of newborn infants | Brazil  | Focus group/ interview | 293 Facilities | N/A                      | N/A            | N/A                         | N/A                                   | N/A                             | N/A                         | N/A                                                                                                             | N/A                | N/A                |
| Gonya       | 2013 | Factors associated with maternal visitation and participation in skin-to-skin care in an all referral level IIIc NICU     | USA     | Focus group/ interview | 32 Mothers     | <27 weeks                | SSC            | N/A                         | N/A                                   | N/A                             | N/A                         | N/A                                                                                                             | N/A                | N/A                |
| Gray        | 2000 | Skin-to-skin contact is analgesic in healthy newborns                                                                     | USA     | RCT                    | 30 Newborns    | Full term                | SSC,EBF        | 10-15 min before heel stick | N/A                                   | ≤1                              | 1                           | N/A                                                                                                             | N/A                | N/A                |
| Gregson     | 2011 | Kangaroo care in pre-term or low birth weight babies in a postnatal ward                                                  | UK      | Prospective Cohort     | 214 Newborns   | All ages                 | SSC            | N/A                         | N/A                                   | N/A                             | N/A                         | N/A                                                                                                             | 6 weeks            | Health facility    |
| Gupta       | 2007 | Kangaroo Mother Care (KMC) in LBW infants - A western Rajasthan experience                                                | India   | Facility evaluation    | 50 Newborns    | <2000g                   | SSC            | N/A                         | N/A                                   | 6-Apr                           | N/A                         | >1800g, gestation >34 weeks, mother' confidence in baby care, gaining weight, no illness, no IV medication, EBF | N/A                | Home               |
| Hake-Brooks | 2008 | Kangaroo care and breastfeeding of mother-preterm infant dyads 0-18 month:                                                | USA     | RCT                    | 66 Dyads       | 32-36 weeks              | SSC,EBF        | N/A                         | N/A                                   | N/A                             | 5                           | N/A                                                                                                             | N/A                | N/A                |

| Author      | Year | Title                                                                                                                               | Country | Study design              | Sample size | Newborns Characteristics | KMC components | Onset of SSC                           | Stability criteria for KMC initiation | Hours per day of KMC provision* | # of days of KMC provision* | Discharge criteria for Kangarooed baby | Follow-up duration | Follow-up location |
|-------------|------|-------------------------------------------------------------------------------------------------------------------------------------|---------|---------------------------|-------------|--------------------------|----------------|----------------------------------------|---------------------------------------|---------------------------------|-----------------------------|----------------------------------------|--------------------|--------------------|
|             |      | a randomized, controlled trial                                                                                                      |         |                           |             |                          |                |                                        |                                       |                                 |                             |                                        |                    |                    |
| Haxton      | 2012 | Implementing skin-to-skin contact at birth using the Iowa model: applying evidence to practice                                      | USA     | Intervention, qualitative | 30 Mothers  | All ages                 | SSC,EBF        | Within one hour after birth            | N/A                                   | 1                               | 1                           | N/A                                    | N/A                | N/A                |
| Heidarzadeh | 2013 | The Effect of Kangaroo Mother Care (KMC) on Breast Feeding at the Time of NICU Discharge                                            | Iran    | Prospective Cohort        | 251 Dyads   | ≥28 weeks                | N/A            | Immediately after birth                | Stable situation (no more definition) | 3-9                             | N/A                         | N/A                                    | N/A                | N/A                |
| Heimann     | 2010 | Impact of skin to skin care, prone and supine positioning on cardiorespiratory parameters and thermoregulation in premature infants | Germany | Crossover                 | 18 Newborns | 24-32 weeks, 750-2100g   | SSC            | After supine position, no more details | N/A                                   | 2                               | 1                           | N/A                                    | N/A                | N/A                |
| Heimann     | 2013 | Infrared thermography for detailed registration of thermoregulation in premature infants                                            | Germany | Pre-post                  | 10 Newborns | <32 weeks, 720-1450g     | SSC            | N/A                                    | N/A                                   | 1-1.5                           | 1                           | N/A                                    | N/A                | N/A                |



| Author           | Year | Title                                                                                                                                      | Country | Study design           | Sample size                           | Newborns Characteristics | KMC components | Onset of SSC            | Stability criteria for KMC initiation                                                                                                             | Hours per day of KMC provision* | # of days of KMC provision* | Discharge criteria for Kangarooed baby | Follow-up duration | Follow-up location |
|------------------|------|--------------------------------------------------------------------------------------------------------------------------------------------|---------|------------------------|---------------------------------------|--------------------------|----------------|-------------------------|---------------------------------------------------------------------------------------------------------------------------------------------------|---------------------------------|-----------------------------|----------------------------------------|--------------------|--------------------|
| Hennig           | 2006 | Health professional's knowledge and practices about                                                                                        | Brazil  | Cross sectional        | 148 Doctors and nurses, 11 Facilities | LBW: N/A cutoff          | N/A            | Clinical stability      | 0.59 of the professionals did use (stable and not intubated) as criteria and 0.30 related allowed contact even when newborn stable but intubated. | N/A                             | N/A                         | N/A                                    | N/A                | N/A                |
| Hernandez Molina | 1988 | Bio-psychosocial risk factors in children under one year of age of mother kangaroo program of the instituto materno infantil, Bogota, 1987 | USA     | RCT                    | 8 Newborns                            | Premature: N/A cutoff    | SSC            | N/A                     | N/A                                                                                                                                               | N/A                             | N/A                         | N/A                                    | N/A                | N/A                |
| Hill             | 2010 | Keeping newborns warm: beliefs, practices and potential for behaviour change in rural Ghana                                                | Ghana   | Focus group/ interview | 635 Mothers, 14 Villages              | All ages                 | SSC            | N/A                     | N/A                                                                                                                                               | N/A                             | N/A                         | N/A                                    | N/A                | N/A                |
| Huang            | 2006 | [Effect of very early kangaroo care on extra-uterine temperature adaptation in newborn infants with hypothermia problems]                  | Taiwan  | RCT                    | 164 Dyads                             | Full term                | SSC            | Immediately after birth | N/A                                                                                                                                               | N/A                             | N/A                         | N/A                                    | N/A                | N/A                |

| Author  | Year | Title                                                                                                                                                                         | Country             | Study design           | Sample size                                  | Newborns Characteristics                    | KMC components | Onset of SSC     | Stability criteria for KMC initiation    | Hours per day of KMC provision* | # of days of KMC provision* | Discharge criteria for Kangarooed baby | Follow-up duration | Follow-up location |
|---------|------|-------------------------------------------------------------------------------------------------------------------------------------------------------------------------------|---------------------|------------------------|----------------------------------------------|---------------------------------------------|----------------|------------------|------------------------------------------|---------------------------------|-----------------------------|----------------------------------------|--------------------|--------------------|
| Ibe     | 2004 | A comparison of kangaroo mother care and conventional incubator care for thermal regulation of infants < 2000 g in Nigeria using continuous ambulatory temperature monitoring | Nigeria             | Crossover              | 13 Newborns, 11 Mothers and female relatives | 1200-1999g                                  | SSC            | After enrollment | Able to tolerate handling without stress | 12                              | N/A                         | N/A                                    | N/A                | N/A                |
| Issah   | 2011 | Maternal and neonatal survival and mortality in the Upper West Region of Ghana                                                                                                | Ghana               | Prospective Cohort     | 695 Newborns, 5 Facilities                   | Premature: N/A cutoff, 588 LBW, 107 preterm | N/A            | N/A              | N/A                                      | N/A                             | N/A                         | N/A                                    | N/A                | N/A                |
| Jang    | 2008 | The Effect of Kangaroo Care on Weight and Stress Hormone (Cortisol) in Premature Infants                                                                                      | South Korea         | RCT                    | 31 Newborns                                  | <35 weeks, <1800g                           | N/A            | N/A              | N/A                                      | 3                               | 3                           | N/A                                    | N/A                | N/A                |
| Johnson | 2007 | Factors influencing implementation of kangaroo holding in a Special Care Nursery                                                                                              | USA                 | Focus group/ interview | 17 Nurses                                    | N/A                                         | N/A            | N/A              | N/A                                      | N/A                             | N/A                         | N/A                                    | N/A                | N/A                |
| Johnson | 2007 | The Maternal Experience of Kangaroo Holding                                                                                                                                   | Mid-Atlantic Region | Focus group/ interview | 18 Mothers                                   | N/A                                         | N/A            | N/A              | N/A                                      | ≥1                              | N/A                         | N/A                                    | N/A                | N/A                |

| Author   | Year | Title                                                                                            | Country | Study design          | Sample size               | Newborns Characteristics | KMC components | Onset of SSC                            | Stability criteria for KMC initiation                                                                                                                                 | Hours per day of KMC provision* | # of days of KMC provision* | Discharge criteria for Kangarooed baby | Follow-up duration | Follow-up location |
|----------|------|--------------------------------------------------------------------------------------------------|---------|-----------------------|---------------------------|--------------------------|----------------|-----------------------------------------|-----------------------------------------------------------------------------------------------------------------------------------------------------------------------|---------------------------------|-----------------------------|----------------------------------------|--------------------|--------------------|
| Johnston | 2012 | Alternative female kangaroo care for procedural pain in preterm neonates: a pilot study          | Canada  | Randomized cross-over | 41 Newborns               | 28-37 weeks              | SSC            | 30 min before heel lance procedure      | N/A                                                                                                                                                                   | ≤1                              | 2                           | N/A                                    | N/A                | N/A                |
| Johnston | 2003 | Kangaroo care is effective in diminishing pain response in preterm neonates                      | Canada  | Randomized cross-over | 74 Newborns, 3 Facilities | 32-36 weeks              | SSC            | 30 minutes before heel stick            | Apgar > 6 at 5 min, unassisted breathing, no major congenital anomalies, no grade III or IV IVH, subsequent periventricular leukomalacia, not undergone surgery       | 0.7                             | 1                           | N/A                                    | N/A                | N/A                |
| Johnston | 2008 | Kangaroo mother care diminishes pain from heel lance in very preterm neonates: a crossover trial | Canada  | Randomized cross-over | 61 Newborns               | 28-31 weeks              | SSC            | ≥15 min prior to heel lancing procedure | Apgar ≥ 6 at 5 minutes, unassisted breathing, no major congenital anomalies, no grade III or IV IVH or subsequent periventricular leukomalacia, not undergone surgery | 0.5                             | N/A                         | N/A                                    | N/A                | N/A                |

| Author    | Year | Title                                                                                                     | Country  | Study design          | Sample size  | Newborns Characteristics    | KMC components | Onset of SSC                                    | Stability criteria for KMC initiation               | Hours per day of KMC provision* | # of days of KMC provision* | Discharge criteria for Kangarooed baby                                                                                       | Follow-up duration | Follow-up location |
|-----------|------|-----------------------------------------------------------------------------------------------------------|----------|-----------------------|--------------|-----------------------------|----------------|-------------------------------------------------|-----------------------------------------------------|---------------------------------|-----------------------------|------------------------------------------------------------------------------------------------------------------------------|--------------------|--------------------|
| Johnston  | 2011 | Paternal vs maternal kangaroo care for procedural pain in pre-term neonates: a randomized crossover trial | Canada   | Randomized cross-over | 62 Newborns  | 28-36 weeks                 | SSC            | At least 15 minutes before heel lance procedure | N/A                                                 | ≤1                              | 2                           | N/A                                                                                                                          | N/A                | N/A                |
| Kadam     | 2005 | Feasibility of kangaroo mother care in Mumbai                                                             | India    | RCT                   | 89 Newborns  | <1800g                      | SSC, EBF       | N/A                                             | Stable in cardiovascular status                     | ≥1                              | N/A                         | weight-gain 3 consecutive days, normal unassisted temperature, well breast-fed/spoon feeds, mother's confidence in baby care | N/A                | N/A                |
| Kaffashi  | 2013 | An analysis of the kangaroo care intervention using neonatal EEG complexity: a preliminary study          | USA      | Prospective cohort    | 126 Newborns | Premature, Full term        | SSC            | N/A                                             | N/A                                                 | N/A                             | 56                          | N/A                                                                                                                          | N/A                | N/A                |
| Kambarami | 1999 | Kangaroo care for well low birth weight infants at Harare central hospital maternity unit - Zimbabwe      | Zimbabwe | Facility evaluation   | 613 Dyads    | Preterm: N/A cutoff, <2000g | N/A            | N/A                                             | Well preterm infants able to suck and weighed ≤2001 | N/A                             | N/A                         | N/A                                                                                                                          | N/A                | N/A                |

| Author     | Year | Title                                                                                                 | Country  | Study design           | Sample size   | Newborns Characteristics      | KMC components | Onset of SSC                                                                       | Stability criteria for KMC initiation                                                                                        | Hours per day of KMC provision* | # of days of KMC provision* | Discharge criteria for Kangarooed baby | Follow-up duration | Follow-up location |
|------------|------|-------------------------------------------------------------------------------------------------------|----------|------------------------|---------------|-------------------------------|----------------|------------------------------------------------------------------------------------|------------------------------------------------------------------------------------------------------------------------------|---------------------------------|-----------------------------|----------------------------------------|--------------------|--------------------|
| Kambarami  | 2002 | Caregivers' perceptions and experiences of 'kangaroo care' in a developing country                    | Zimbabwe | Focus group/ interview | N/A Mothers   | LBW:N/A cutoff,               | N/A            | N/A                                                                                | The infants was nursed in incubators until there were stable and no longer required oxygen, then there were sent to KMC unit | N/A                             | N/A                         | Weighing 1000g                         | N/A                | Health facility    |
| Kambarami  | 1998 | Kangaroo care versus incubator care in the management of well pre-term infants- a pilot study         | Zimbabwe | Intervention           | 74 Dyads      | Premature: N/A cutoff, <1600g | SSC            | After identifying a well preterm infants based on the neonatologist visit          | Able to suck, no need to special care, oxygen or medication                                                                  | N/A                             | N/A                         | N/A                                    | N/A                | N/A                |
| Karlsson   | 2012 | Early skin-to-skin care in extremely preterm infants: thermal balance and care environment            | Sweden   | Pre-post               | 27 New-borns  | <27 weeks                     | SSC            | Within a few days after birth when stable, after 30 min of monitoring in incubator | Neo-neonatologist deems respiratory, thermodynamically and thermal balance stable                                            | ≥1                              | N/A                         | N/A                                    | N/A                | N/A                |
| Karlsson   | 1996 | Skin to skin care: heat balance                                                                       | Sweden   | Prepost                | 9 New-borns   | Full term                     | SSC            | N/A                                                                                | N/A                                                                                                                          | 1                               | 1                           | N/A                                    | N/A                | N/A                |
| Kashaninia | 2008 | The effect of Kangaroo Care on behavioral responses to pain of an intramuscular injection in neonates | Iran     | RCT                    | 100 New-borns | Full term, Non LBW            | SSC            | 10 minutes before procedure                                                        | N/A                                                                                                                          | N/A                             | N/A                         | N/A                                    | N/A                | N/A                |



| Author     | Year | Title                                                                                                                                   | Country     | Study design          | Sample size                 | Newborns Characteristics | KMC components | Onset of SSC            | Stability criteria for KMC initiation                                                                                        | Hours per day of KMC provision* | # of days of KMC provision* | Discharge criteria for Kangarooed baby | Follow-up duration | Follow-up location |
|------------|------|-----------------------------------------------------------------------------------------------------------------------------------------|-------------|-----------------------|-----------------------------|--------------------------|----------------|-------------------------|------------------------------------------------------------------------------------------------------------------------------|---------------------------------|-----------------------------|----------------------------------------|--------------------|--------------------|
|            |      | care: A phenomenological study                                                                                                          |             |                       |                             |                          |                |                         |                                                                                                                              |                                 |                             |                                        |                    |                    |
| Kyoko      | 2006 | Implementation of Kangaroo Care Immediately After Child-birth                                                                           | Japan       | Survey at one year    | 106 Mothers                 | N/A                      | N/A            | Immediately after birth | N/A                                                                                                                          | N/A                             | N/A                         | N/A                                    | N/A                | N/A                |
| Lamy Filho | 2008 | Evaluation of the neonatal outcomes of the kangaroo mother method in Brazil                                                             | Brazil      | Prospective Cohort    | 985 Newborns, 16 Facilities | 500-1749g                | SSC, EBF       | N/A                     | Clinical stability                                                                                                           | N/A                             | N/A                         | N/A                                    | N/A                | N/A                |
| Lau        | 2007 | Ethnic/racial diversity, maternal stress, lactation and very low birth-weight infants                                                   | USA         | Descriptive           | 163 Mothers                 | 26-29 weeks              | SSC            | N/A                     | N/A                                                                                                                          | N/A                             | N/A                         | N/A                                    | N/A                | N/A                |
| Lee        | 2011 | The Effects of Kangaroo Care on Maternal Self-esteem and Premature Infants' Physiological Stability                                     | South Korea | Pre-post              | 34 Dyads                    | >32 weeks, 1000-2000g    | SSC            | After feeding           | N/A                                                                                                                          | 0.5                             | 14                          | N/A                                    | N/A                | N/A                |
| Lee        | 2012 | Clinician perspectives on barriers to and opportunities for skin-to-skin contact for premature infants in neonatal intensive care units | USA         | Focus group/interview | 69 HCPs, 11 Facilities      | N/A                      | SSC            | N/A                     | Determined by age, weight, respiratory distress, blood pressure, temperature, apnea, bradycardia, oxygen desaturation events | N/A                             | N/A                         | N/A                                    | N/A                | N/A                |

| Author      | Year | Title                                                                                                                                  | Country      | Study design              | Sample size              | Newborns Characteristics          | KMC components | Onset of SSC                  | Stability criteria for KMC initiation                                                      | Hours per day of KMC provision* | # of days of KMC provision* | Discharge criteria for Kangarooed baby | Follow-up duration | Follow-up location |
|-------------|------|----------------------------------------------------------------------------------------------------------------------------------------|--------------|---------------------------|--------------------------|-----------------------------------|----------------|-------------------------------|--------------------------------------------------------------------------------------------|---------------------------------|-----------------------------|----------------------------------------|--------------------|--------------------|
| Lee         | 2007 | Effects of Kangaroo Care on anxiety, maternal role confidence, and maternal infant attachment of mothers who delivered preterm infants | South Korea  | Pre-post                  | 43 Mothers               | Premature: N/A cutoff,            | N/A            | N/A                           | N/A                                                                                        | N/A                             | 4                           | N/A                                    | N/A                | N/A                |
| Legault     | 1995 | Comparison of kangaroo and traditional methods of removing preterm infants from incubators                                             | Canada       | RCT, pre-post, cross over | 61 Dyads                 | Premature: N/A cutoff, 1000-1800g | SSC            | Once eligible: N/A definition | ≤1 respiratory pause or one episode of bradycardia in the past 5 days, started weight gain | 0.5                             | 1                           | N/A                                    | N/A                | N/A                |
| Lemmen      | 2013 | Kangaroo care in a neonatal context: parents' experiences of information and communication of nurse-parents                            | Sweden       | Focus group/ interview    | 15 Newborns, 12 Families | 24-35 weeks                       | SSC            | N/A                           | N/A                                                                                        | N/A                             | N/A                         | N/A                                    | N/A                | N/A                |
| Leonard     | 2008 | Parents' Lived Experience of Providing Kangaroo Care to their Preterm Infants                                                          | South Africa | Focus group/ interview    | 6 Parents                | Premature: N/A cutoff             | N/A            | N/A                           | N/A                                                                                        | N/A                             | N/A                         | N/A                                    | N/A                | N/A                |
| Lerthamteew | 2000 | The effects of kangaroo care on body temperature, body weight and maternal satisfaction in premature                                   | N/A          | RCT                       | 30 Newborns              | 33-35 weeks PCA                   | N/A            | N/A                           | N/A                                                                                        | 1.5-2                           | N/A                         | N/A                                    | N/A                | N/A                |

| Author   | Year | Title                                                                                                                                    | Country    | Study design        | Sample size  | Newborns Characteristics | KMC components   | Onset of SSC                                                                                                                                                                                       | Stability criteria for KMC initiation | Hours per day of KMC provision* | # of days of KMC provision* | Discharge criteria for Kangarooed baby                      | Follow-up duration                                                                             | Follow-up location       |
|----------|------|------------------------------------------------------------------------------------------------------------------------------------------|------------|---------------------|--------------|--------------------------|------------------|----------------------------------------------------------------------------------------------------------------------------------------------------------------------------------------------------|---------------------------------------|---------------------------------|-----------------------------|-------------------------------------------------------------|------------------------------------------------------------------------------------------------|--------------------------|
|          |      | infants                                                                                                                                  |            |                     |              |                          |                  |                                                                                                                                                                                                    |                                       |                                 |                             |                                                             |                                                                                                |                          |
| Lima     | 2000 | Feasibility, acceptability and cost of kangaroo mother care in Recife, Brazil                                                            | Brazil     | Facility evaluation | 114 Newborns | 1000-1750g               | SSC, EBF, FU     | After stabilization                                                                                                                                                                                | Unassisted breathing                  | N/A                             | N/A                         | N/A                                                         | N/A                                                                                            | Home and health facility |
| Lincetto | 1998 | Impact of season and discharge weight on complications and growth of Kangaroo Mother Care treated low birth weight infants in Mozambique | Mozambique | Prospective Cohort  | 246 Newborns | <2000g                   | SSC, EBF, DC, FU | Stabilized health condition, sucking reflex, thermoregulation, mother's condition enabling her to care for the LBW infant, cessation of infant IV, oxygen, and phototherapy, no feeding by NG tube | Same criteria as onset of SSC         | >20                             | N/A                         | Weight $\geq$ 1500g, weight gain through 3 consecutive days | Twice weekly for 1500-1700g, once weekly for 1700-2000g, and fortnightly for over 2000g babies | Health facility          |

| Author          | Year | Title                                                                                                                                  | Country    | Study design         | Sample size  | Newborns Characteristics      | KMC components   | Onset of SSC                                                                                                                             | Stability criteria for KMC initiation | Hours per day of KMC provision* | # of days of KMC provision* | Discharge criteria for Kangarooed baby              | Follow-up duration                       | Follow-up location |
|-----------------|------|----------------------------------------------------------------------------------------------------------------------------------------|------------|----------------------|--------------|-------------------------------|------------------|------------------------------------------------------------------------------------------------------------------------------------------|---------------------------------------|---------------------------------|-----------------------------|-----------------------------------------------------|------------------------------------------|--------------------|
| Lincetto        | 2000 | Kangaroo mother care with limited resources                                                                                            | Mozambique | Facility evaluation  | 32 Newborns  | ≤1800g                        | SSC, EBF, DC, FU | As soon as possible after admission to all infants < 1800 g, irrespective of GA, place of birth, and health condition                    | N/A                                   | N/A                             | N/A                         | Weight ≥1500g, weight gain for ≥ 3 consecutive days | Twice a week until infant reached 2500 g | Health facility    |
| Lizarazo-Medina | 2012 | The kangaroo mothers' program: a simple and cost-effective alternative for protecting the premature newborn or low-birth-weight babies | Colombia   | Retrospective cohort | 374 Newborns | Premature and LBW: N/A cutoff | SSC              | N/A                                                                                                                                      | N/A                                   | N/A                             | 240                         | N/A                                                 | N/A                                      | N/A                |
| Ludington-Hoe   | 2000 | Kangaroo care compared to incubators in maintaining body warmth in preterm infants                                                     | USA        | RCT, pre/post        | 29 Newborns  | 26-35 weeks, 770-2710g        | SSC, EBF         | The KC period began once the infant had been transferred from the incubator to the mother who was sitting in an upright chair beside the | N/A                                   | 2.5-3.83                        | 1                           | N/A                                                 | N/A                                      | N/A                |

| Author        | Year | Title                                                                                                                                                  | Country  | Study design  | Sample size | Newborns Characteristics | KMC components | Onset of SSC                              | Stability criteria for KMC initiation | Hours per day of KMC provision* | # of days of KMC provision* | Discharge criteria for Kangarooed baby | Follow-up duration | Follow-up location |
|---------------|------|--------------------------------------------------------------------------------------------------------------------------------------------------------|----------|---------------|-------------|--------------------------|----------------|-------------------------------------------|---------------------------------------|---------------------------------|-----------------------------|----------------------------------------|--------------------|--------------------|
|               |      |                                                                                                                                                        |          |               |             |                          |                | incubator                                 |                                       |                                 |                             |                                        |                    |                    |
| Ludington-Hoe | 2001 | Kangaroo mother care during phototherapy: effect on bilirubin profile                                                                                  | USA      | RCT           | 30 Newborns | 30-35 weeks, <2500g      | SSC            | Once eligible: N/A definition             | N/A                                   | 1                               | 10                          | N/A                                    | N/A                | N/A                |
| Ludington-Hoe | 1999 | Birth-related fatigue in 34-36-week preterm neonates: rapid recovery with very early kangaroo (skin-to-skin) care                                      | Colombia | Descriptive   | 6 Newborns  | 34-36 weeks              | SSC, EBF       | Immediately after birth                   | N/A                                   | 6                               | 1                           | N/A                                    | N/A                | N/A                |
| Ludington-Hoe | 2006 | Neurophysiologic assessment of neonatal sleep organization: Preliminary results of a randomized, controlled trial of skin contact with preterm infants | USA      | RCT           | 28 Newborns | 28-32 weeks              | SSC            | Once eligible: N/A definition             | Apgar >6 at 5 min                     | 2-3                             | 1                           | N/A                                    | N/A                | N/A                |
| Ludington-Hoe | 2004 | Randomized controlled trial of kangaroo care: cardiorespiratory and thermal                                                                            | N/A      | RCT, pre/post | 24 Newborns | 32-36 weeks              | SSC, EBF       | After pretest phase, determined by breast | No medication in the last 24 hours    | 3                               | 1                           | N/A                                    | N/A                | N/A                |

| Author        | Year | Title                                                                                                     | Country                 | Study design          | Sample size   | Newborns Characteristics | KMC components | Onset of SSC                                                        | Stability criteria for KMC initiation   | Hours per day of KMC provision* | # of days of KMC provision* | Discharge criteria for Kangarooed baby | Follow-up duration | Follow-up location |
|---------------|------|-----------------------------------------------------------------------------------------------------------|-------------------------|-----------------------|---------------|--------------------------|----------------|---------------------------------------------------------------------|-----------------------------------------|---------------------------------|-----------------------------|----------------------------------------|--------------------|--------------------|
|               |      | effects on healthy preterm infants                                                                        |                         |                       |               |                          |                | feeding                                                             |                                         |                                 |                             |                                        |                    |                    |
| Ludington-Hoe | 2005 | Skin-to-skin contact (Kangaroo Care) analgesia for preterm infant heel stick                              | El Salvador             | Randomized cross-over | 23 Newborns   | <37 weeks                | SSC            | 3 hours before heel stick                                           | N/A                                     | 3                               | 1                           | N/A                                    | N/A                | N/A                |
| Lyngstad      | 2014 | Does skin-to-skin contact reduce stress during diaper change in preterm infants?                          | Norway                  | Randomized cross-over | 19 Newborns   | 28-34 weeks              | SSC            | N/A                                                                 | N/A                                     | N/A                             | 2                           | N/A                                    | N/A                | N/A                |
| Maastrup      | 2010 | Extremely preterm infants tolerate skin-to-skin contact during the first weeks of life                    | Sweden, Norway, Denmark | Pre-post              | 22 Newborns   | <28 weeks                | SSC            | After pre-test                                                      | N/A                                     | N/A                             | 1                           | N/A                                    | N/A                | N/A                |
| Maastrup      | 2012 | Breastfeeding Support in Neonatal Intensive Care: A National Survey                                       | Denmark                 | Facility evaluation   | 19 Facilities | N/A                      | SSC            | 18 out of 19 aimed within 24 h postpartum for stable preterm infant | N/A                                     | N/A                             | N/A                         | N/A                                    | N/A                | N/A                |
| Mahmood       | 2011 | Effect of mother-infant early skin-to-skin contact on breastfeeding status: a randomized controlled trial | Pakistan                | RCT                   | 183 Dyads     | ≥37 weeks, ≥2500g        | SSC, EBF       | Once eligible: N/A definition                                       | No respiratory stress and weight >2500g | ≥0.75-2                         | 30                          | N/A                                    | N/A                | N/A                |

| Author        | Year | Title                                                                                                                          | Country          | Study design                      | Sample size                       | Newborns Characteristics | KMC components | Onset of SSC            | Stability criteria for KMC initiation                     | Hours per day of KMC provision* | # of days of KMC provision* | Discharge criteria for Kangarooed baby                       | Follow-up duration | Follow-up location |
|---------------|------|--------------------------------------------------------------------------------------------------------------------------------|------------------|-----------------------------------|-----------------------------------|--------------------------|----------------|-------------------------|-----------------------------------------------------------|---------------------------------|-----------------------------|--------------------------------------------------------------|--------------------|--------------------|
| Mallet        | 2007 | [Skin to skin contact in neonatal care: knowledge and expectations of health professionals in 2 neonatal intensive care units] | France           | Focus group/ interview            | 21 Doctors, 100 Paramedical staff | N/A                      | N/A            | N/A                     | N/A                                                       | N/A                             | N/A                         | N/A                                                          | N/A                | N/A                |
| Marin Gabriel | 2010 | Randomized controlled trial of early skin-to-skin contact: effects on the mother and the newborn                               | Spain            | RCT                               | 274 Dyads                         | 35-42 weeks              | SSC, EBF, FU   | Immediately after birth | No need to resuscitation or intubation, no meconium fluid | 2                               | 1                           | N/A                                                          | N/A                | Home               |
| Marin Gabriel | 2008 | Evaluation of pain in a neonatal intensive care unit during endocrine-metabolic tests                                          | Spain            | RCT                               | 54 Newborns                       | Premature: N/A cutoff    | SSC            | N/A                     | N/A                                                       | ≤1                              | 1                           | N/A                                                          | N/A                | N/A                |
| Martins       | 2008 | Living in the other side of kangaroo method: the mother's experience                                                           | Brazil           | Focus group/ interview            | 5 Mothers                         | N/A                      | N/A            | N/A                     | N/A                                                       | N/A                             | N/A                         | N/A                                                          | N/A                | N/A                |
| McMaster      | 2000 | Kangaroo care in Port Moresby, Papua New Guinea                                                                                | Papua New Guinea | Chart review, facility evaluation | 109 Newborns                      | <1500g                   | SSC            | N/A                     | N/A                                                       | N/A                             | N/A                         | Baby fully breast fed, gained weight, mother fully confident | N/A                | Home               |
| Messmer       | 1997 | Effect of kangaroo care on sleep time for neonates                                                                             | USA              | Pre-post                          | 20 Dyads                          | 26-37 weeks, 750-1500g   | SSC            | After pre period        | N/A                                                       | 1                               | 1                           | N/A                                                          | N/A                | N/A                |

| Author         | Year | Title                                                                                                                 | Country | Study design | Sample size | Newborns Characteristics | KMC components | Onset of SSC                     | Stability criteria for KMC initiation                                                                                                         | Hours per day of KMC provision* | # of days of KMC provision*        | Discharge criteria for Kangarooed baby | Follow-up duration                            | Follow-up location |
|----------------|------|-----------------------------------------------------------------------------------------------------------------------|---------|--------------|-------------|--------------------------|----------------|----------------------------------|-----------------------------------------------------------------------------------------------------------------------------------------------|---------------------------------|------------------------------------|----------------------------------------|-----------------------------------------------|--------------------|
| Miles          | 2006 | A controlled trial of skin-to-skin contact in extremely preterm infants                                               | UK      | RCT          | 78 Newborns | <32 weeks                | SSC            | Once eligible:<br>N/A definition | not ventilated, no repeated apnea or bradycardia, not on inotropic support, a stable core-peripheral temperature gap of less than 2 degrees C | 0.33                            | 28                                 | N/A                                    | 4 mo and 12 mo post-birth and 12 mo from term | Health facility    |
| Milstersteiner | 2003 | Physiological responses of the Kangaroo Mother Position in low birth weight, spontaneous ventilating premature babies | Brazil  | Pre-post     | 46 Dyads    | 24-37 weeks, <2000g      | SSC, EBF       | Once eligible:<br>N/A definition | One hour after feeding                                                                                                                        | 1                               | Depends on mother's length of stay | N/A                                    | N/A                                           | N/A                |
| Mitchell       | 2013 | Does daily kangaroo care provide sustained pain and stress relief in preterm infants?                                 | USA     | RCT          | 54 Newborns | 27-30 weeks, ≥1000g      | SSC            | 5 days of life                   | N/A                                                                                                                                           | ≥2                              | 5                                  | N/A                                    | N/A                                           | N/A                |
| Mitchell       | 2013 | Effects of daily kangaroo care on cardio-respiratory parameters in preterm infants                                    | USA     | RCT          | 38 Newborns | 27-30 weeks, 1000-1500g  | SSC            | 5 day of life                    | N/A                                                                                                                                           | 2                               | 5                                  | N/A                                    | N/A                                           | N/A                |

| Author             | Year | Title                                                                                                                                                                    | Country     | Study design           | Sample size | Newborns Characteristics         | KMC components | Onset of SSC                  | Stability criteria for KMC initiation     | Hours per day of KMC provision* | # of days of KMC provision* | Discharge criteria for Kangarooed baby                               | Follow-up duration | Follow-up location |
|--------------------|------|--------------------------------------------------------------------------------------------------------------------------------------------------------------------------|-------------|------------------------|-------------|----------------------------------|----------------|-------------------------------|-------------------------------------------|---------------------------------|-----------------------------|----------------------------------------------------------------------|--------------------|--------------------|
| Mohammed El-Nagger | 2013 | Effect of kangaroo mother care on premature infants' physiological, behavioral and psychosocial outcomes in Ain Shams maternity and Gynecological Hospital, Cairo, Egypt | Egypt       | Pre-post               | 50 Dyads    | Premature and LBW but N/A cutoff | SSC            | Once eligible: N/A definition | N/A                                       | 1                               | 1                           | N/A                                                                  | N/A                | N/A                |
| Monasterolo        | 1998 | Kangaroo care in pre-term newborn infants admitted to a Neonatal Intensive Care Unit                                                                                     | Spain       | Prospective Cohort     | 38 Newborns | Premature: N/A cutoff            | SSC, EBF       | N/A                           | N/A                                       | 1-8                             | N/A                         | N/A                                                                  | N/A                | N/A                |
| Moon               | 2000 | The Effects of Kangaroo Care on Anxiety and Confidence and Gratification of Mothering Role in Mothers of Low Birth Weight Infants                                        | South Korea | RCT                    | 30 Newborns | LBW:N/A cutoff                   | N/A            | N/A                           | N/A                                       | ≥ 0.67                          | 26                          | N/A                                                                  | N/A                | N/A                |
| Moreira            | 2009 | Kangaroo mother program and the relationship mother-baby: qualitative research in a public maternity of Betim city                                                       | Brazil      | Focus group/ interview | 8 Mothers   | 30-32 weeks, <2000g              | SSC            | Once eligible: N/A definition | Weight gain and stabilization of the baby | N/A                             | N/A                         | Mother prepared to baby care, weight ≥1500 g , suction capacity, EBF | N/A                | Health facility    |

| Author   | Year | Title                                                                                                                                           | Country      | Study design           | Sample size  | Newborns Characteristics | KMC components | Onset of SSC                                              | Stability criteria for KMC initiation | Hours per day of KMC provision* | # of days of KMC provision* | Discharge criteria for Kangarooed baby | Follow-up duration | Follow-up location |
|----------|------|-------------------------------------------------------------------------------------------------------------------------------------------------|--------------|------------------------|--------------|--------------------------|----------------|-----------------------------------------------------------|---------------------------------------|---------------------------------|-----------------------------|----------------------------------------|--------------------|--------------------|
| Morelius | 2005 | Salivary cortisol and mood and pain profiles during skin-to-skin care for an unselected group of mothers and infants in neonatal intensive care | Sweden       | Pre-post               | 17 Dyads     | 33 weeks, 495-2590g      | SSC            | N/A                                                       | N/A                                   | 1                               | 2                           | N/A                                    | N/A                | N/A                |
| Morelius | 2012 | Time of initiation of skin-to-skin contact in extremely preterm infants in Sweden                                                               | Sweden       | Pop based surveillance | 520 Newborns | <27 weeks                | SSC            | N/A                                                       | N/A                                   | N/A                             | N/A                         | N/A                                    | N/A                | N/A                |
| Morgan   | 2011 | Should Neonates Sleep Alone?                                                                                                                    | South Africa | Randomized cross-over  | 16 Dyads     | Full term                | SSC            | N/A                                                       | N/A                                   | 1                               | 1                           | N/A                                    | N/A                | N/A                |
| Muddu    | 2013 | Knowledge and awareness about benefits of kangaroo mother care                                                                                  | India        | Pre-post, qualitative  | 46 Dyads     | 28-37 weeks              | N/A            | After asking questions from mothers as baseline knowledge | N/A                                   | 1                               | 1                           | N/A                                    | N/A                | N/A                |
| Nagai    | 2010 | Earlier versus later continuous Kangaroo Mother Care (KMC) for stable low-birth-weight infants: a randomized controlled trial                   | Madagascar   | RCT                    | 73 Newborns  | <2500g                   | SSC, EBF       | Immediately after birth                                   | N/A                                   | N/A                             | N/A                         | N/A                                    | N/A                | N/A                |

| Author   | Year | Title                                                                                                                                                                                  | Country    | Study design          | Sample size | Newborns Characteristics      | KMC components | Onset of SSC                                                   | Stability criteria for KMC initiation                                                  | Hours per day of KMC provision* | # of days of KMC provision* | Discharge criteria for Kangarooed baby | Follow-up duration                                            | Follow-up location       |
|----------|------|----------------------------------------------------------------------------------------------------------------------------------------------------------------------------------------|------------|-----------------------|-------------|-------------------------------|----------------|----------------------------------------------------------------|----------------------------------------------------------------------------------------|---------------------------------|-----------------------------|----------------------------------------|---------------------------------------------------------------|--------------------------|
| Nagai    | 2011 | Long-term effects of earlier initiated continuous Kangaroo Mother Care (KMC) for low-birth-weight (LBW) infants in Madagascar                                                          | Madagascar | RCT                   | 73 Newborns | <2500g                        | SSC, EBF       | As soon as possible within 24 h GA or after completely settled | Oxygen saturation, 0.95 or more, HR >100 bpm, RR <60 pm, capillary refilling time<3sec | N/A                             | N/A                         | N/A                                    | N/A                                                           | N/A                      |
| Nanavati | 2013 | Effect of Kangaroo Mother Care Expressed Breast Milk Administration on Pain Associated with Removal of Adhesive Tapes in Very Low Birth Weight Neonates: A Randomized Controlled Trial | India      | RCT                   | 50 Newborns | LBW:N/A cutoff                | SSC            | 15 min before removal of tape                                  | N/A                                                                                    | 0.25                            | N/A                         | N/A                                    | N/A                                                           | N/A                      |
| Ndiaye   | 2006 | [Efficiency of kangaroo care on thermoregulation and weight gain of a preterm newborn cohort in Dakar]                                                                                 | Senegal    | Chart review          | 56 Newborns | Premature: N/A cutoff, <2000g | SSC, EBF, FU   | N/A                                                            | N/A                                                                                    | N/A                             | N/A                         | N/A                                    | N/A                                                           | N/A                      |
| Neu      | 2004 | Kangaroo care: is it for everyone?                                                                                                                                                     | USA        | Focus group/interview | 37 Mothers  | 31-34 weeks                   | N/A            | N/A                                                            | N/A                                                                                    | N/A                             | N/A                         | N/A                                    | N/A                                                           | N/A                      |
| Neu      | 2010 | Maternal Holding of Preterm Infants During the Early Weeks After Birth and Dyad Interaction at Six months                                                                              | USA        | RCT                   | 87 Dyads    | 32-34 weeks                   | SSC            | Four weeks after birth of infant                               | N/A                                                                                    | ≥1                              | N/A                         | N/A                                    | Twice a week for 2 weeks followed by weekly visit for 6 weeks | Home and health facility |

| Author      | Year | Title                                                                                                                | Country | Study design                    | Sample size          | Newborns Characteristics  | KMC components | Onset of SSC                                          | Stability criteria for KMC initiation                                             | Hours per day of KMC provision* | # of days of KMC provision*     | Discharge criteria for Kangarooed baby | Follow-up duration                   | Follow-up location |
|-------------|------|----------------------------------------------------------------------------------------------------------------------|---------|---------------------------------|----------------------|---------------------------|----------------|-------------------------------------------------------|-----------------------------------------------------------------------------------|---------------------------------|---------------------------------|----------------------------------------|--------------------------------------|--------------------|
| Neu         | 1999 | Parents' perception of skin-to-skin care with their preterm infants requiring assisted ventilation                   | N/A     | Focus group/ interview          | 8 Mothers, 1 Father  | Premature: Mother, Father | SSC            | N/A                                                   | N/A                                                                               | 1                               | 2                               | N/A                                    | N/A                                  | N/A                |
| Neu         | 2014 | Effect of holding on co-regulation in preterm infants: A randomized controlled trial                                 | USA     | RCT                             | 79 Newborns          | 32-35 weeks               | N/A            | N/A                                                   | N/A                                                                               | 1                               | 3 at baseline & week 2 & week 9 | N/A                                    | Once a week for 8 weeks              | Home               |
| Neu         | 2013 | Influence of holding practice on preterm infant development                                                          | USA     | RCT                             | 87 Dyads             | 32-35 weeks               | N/A            | N/A                                                   | N/A                                                                               | N/A                             | N/A                             | N/A                                    | N/A                                  | N/A                |
| Nguah       | 2011 | Perception and practice of Kangaroo Mother Care after discharge from hospital in Kumasi, Ghana: a longitudinal study | Ghana   | Prospective Cohort              | 195 Dyads            | 1000-2000g                | SSC, EBF, FU   | After admission in hospital and if mother was willing | no life threatening conditions or major congenital abnormalities or requiring ICU | N/A                             | N/A                             | N/A                                    | 1, 2, 3, and 4 weeks after discharge | Health facility    |
| Niela-Vilen | 2013 | Early physical contact between a mother and her NICU-infant in two university hospitals in Finland                   | Finland | Prospective cohort, qualitative | 170 Dyads, 381 Staff | All NICU newborns         | N/A            | Immediately after birth                               | N/A                                                                               | N/A                             | N/A                             | N/A                                    | N/A                                  | N/A                |

| Author    | Year | Title                                                                                                                                              | Country | Study design | Sample size  | Newborns Characteristics      | KMC components | Onset of SSC                                                                | Stability criteria for KMC initiation                                                                                         | Hours per day of KMC provision* | # of days of KMC provision* | Discharge criteria for Kangarooed baby | Follow-up duration | Follow-up location |
|-----------|------|----------------------------------------------------------------------------------------------------------------------------------------------------|---------|--------------|--------------|-------------------------------|----------------|-----------------------------------------------------------------------------|-------------------------------------------------------------------------------------------------------------------------------|---------------------------------|-----------------------------|----------------------------------------|--------------------|--------------------|
| Nimbalkar | 2013 | Kangaroo Mother Care in reducing pain in pre-term neonates on heel prick                                                                           | India   | RCT          | 50 Newborns  | 32-36 weeks, <2500g           | SSC            | 15 minutes before heel stick                                                | Vitally stable, unassisted breathing or on CPAP, no neurological signs, not received analgesics or sedatives within last 24 h | 0.5                             | 1                           | N/A                                    | N/A                | N/A                |
| Nimbalkar | 2012 | Reduced duration of cpap in pre-term babies receiving kangaroo care within an hour of birth - Randomized trial                                     | India   | RCT          | 16 Newborns  | 26-32 weeks                   | N/A            | N/A                                                                         | N/A                                                                                                                           | N/A                             | N/A                         | N/A                                    | N/A                | N/A                |
| Nimbalkar | 2014 | Effect of early skin-to-skin contact following normal delivery on incidence of hypothermia in neonates more than 1800g: a randomized control trial | India   | RCT          | 100 Newborns | Premature: N/A cutoff, ≥1800g | SSC, EBF       | After immediate post delivery care was done, at about 30min-1hr after birth | no need for resuscitation measured at birth                                                                                   | ≥1                              | 1                           | N/A                                    | N/A                | N/A                |

| Author  | Year | Title                                                                                                                                                    | Country | Study design              | Sample size | Newborns Characteristics             | KMC components | Onset of SSC                                              | Stability criteria for KMC initiation                     | Hours per day of KMC provision* | # of days of KMC provision* | Discharge criteria for Kangarooed baby                                                                                                                                             | Follow-up duration | Follow-up location           |
|---------|------|----------------------------------------------------------------------------------------------------------------------------------------------------------|---------|---------------------------|-------------|--------------------------------------|----------------|-----------------------------------------------------------|-----------------------------------------------------------|---------------------------------|-----------------------------|------------------------------------------------------------------------------------------------------------------------------------------------------------------------------------|--------------------|------------------------------|
| Nirmala | 2006 | Kangaroo Mother Care: Effect and perception of mothers and health personnel                                                                              | India   | Qualitative               | 50 Dyads    | Premature: N/A<br>cutoff, 1070-2460g | N/A            | N/A                                                       | N/A                                                       | ≥0.5                            | N/A                         | N/A                                                                                                                                                                                | N/A                | N/A                          |
| Nyqvist | 2008 | Application of the baby friendly hospital initiative to neonatal care: suggestions by Swedish mothers of very preterm infants                            | Sweden  | Focus group/<br>interview | 13 Mothers  | <32 weeks                            | SSC, DC, FU    | N/A                                                       | N/A                                                       | N/A                             | N/A                         | no apnea, unassisted normal temperature, partial oral feeding, adequate weight gain, no illness, parental confidence in caring infants, ability to perform tube and/or cup feeding | N/A                | Home at initial, then clinic |
| Ohgi    | 2002 | Comparison of kangaroo care and standard care: behavioral organization, development, and temperament in healthy, low-birth-weight infants through 1 year | Japan   | Intervention              | 53 Newborns | 1501-2099g                           | SSC, EBF, FU   | As soon as they could tolerate handling outside incubator | As soon as they could tolerate handling outside incubator | N/A                             | N/A                         | N/A                                                                                                                                                                                | 6 and 12 mon. CA   | Home                         |

| Author | Year | Title                                                                                                   | Country  | Study design         | Sample size  | Newborns Characteristics                                               | KMC components | Onset of SSC                 | Stability criteria for KMC initiation | Hours per day of KMC provision* | # of days of KMC provision* | Discharge criteria for Kangarooed baby | Follow-up duration | Follow-up location |
|--------|------|---------------------------------------------------------------------------------------------------------|----------|----------------------|--------------|------------------------------------------------------------------------|----------------|------------------------------|---------------------------------------|---------------------------------|-----------------------------|----------------------------------------|--------------------|--------------------|
| Okan   | 2010 | Analgesic effects of skin-to-skin contact and breastfeeding in procedural pain in healthy term neonates | Turkey   | RCT                  | 108 Newborns | Full term                                                              | SSC            | 15 minutes before heel stick | N/A                                   | ≤1                              | 1                           | N/A                                    | N/A                | N/A                |
| Ortiz  | 2006 | Attachment Relationship Between Adolescent Mothers and Their 'Kangaroo' Babies'                         | Colombia | Prospective Cohort   | 40 Dyads     | All ages                                                               | N/A            | N/A                          | N/A                                   | N/A                             | N/A                         | N/A                                    | N/A                | N/A                |
| Ortiz  | 2006 | Attachment relationships between adolescent mothers and their 'kangaroo' babies                         | Colombia | Retrospective cohort | 40 Dyads     | Premature: N/A cutoff, <2200g in KMC group, Full term in Control group | N/A            | N/A                          | N/A                                   | N/A                             | N/A                         | N/A                                    | N/A                | Health facility    |

| Author | Year | Title                                                                                                                         | Country     | Study design | Sample size | Newborns Characteristics | KMC components | Onset of SSC                                                                                                                                                                                                                                                                                                                                                 | Stability criteria for KMC initiation | Hours per day of KMC provision* | # of days of KMC provision*             | Discharge criteria for Kangarooed baby | Follow-up duration | Follow-up location |
|--------|------|-------------------------------------------------------------------------------------------------------------------------------|-------------|--------------|-------------|--------------------------|----------------|--------------------------------------------------------------------------------------------------------------------------------------------------------------------------------------------------------------------------------------------------------------------------------------------------------------------------------------------------------------|---------------------------------------|---------------------------------|-----------------------------------------|----------------------------------------|--------------------|--------------------|
| Park   | 2014 | Practical application of kangaroo mother care in preterm infants: clinical characteristics and safety of kangaroo mother care | South Korea | Intervention | 31 Newborns | 25-32 weeks              | SSC, EBF       | No apnea, none or self limiting (3 apnea = 1 h), bradycardia, none or > 85–100 beats/min with self-recovery, desaturation, none or = 0.85 with self-recovery and/or FiO2 = 0.4], clinically acceptable blood pressure and others (no arterial line, no chest tube, no intensive phototherapy and no sudden deterioration in condition within the past 2 days | The same as SSC onset criteria        | 0.5-1.5                         | 1–2 times per week until the transition | N/A                                    | N/A                | N/A                |



| Author     | Year | Title                                                                                                        | Country    | Study design           | Sample size | Newborns Characteristics | KMC components | Onset of SSC                                                | Stability criteria for KMC initiation      | Hours per day of KMC provision* | # of days of KMC provision* | Discharge criteria for Kangarooed baby                                                              | Follow-up duration | Follow-up location |
|------------|------|--------------------------------------------------------------------------------------------------------------|------------|------------------------|-------------|--------------------------|----------------|-------------------------------------------------------------|--------------------------------------------|---------------------------------|-----------------------------|-----------------------------------------------------------------------------------------------------|--------------------|--------------------|
| Priya      | 2004 | Kangaroo care for low birth weight babies                                                                    | India      | Crossover              | 30 Dyads    | LBW:N/A cutoff           | SSC            | After the routine care was observed and data were collected | N/A                                        | 2                               | 2                           | N/A                                                                                                 | N/A                | N/A                |
| Quasem     | 2003 | Adaptation of kangaroo mother care for community-based application                                           | Bangladesh | Focus group/ interview | 35 Mothers  | All ages                 | SSC            | N/A                                                         | N/A                                        | N/A                             | N/A                         | N/A                                                                                                 | N/A                | N/A                |
| Rajai      | 2012 | Comparison of effect of kangaroo care and mother holding on sleep and waking states of preterm neonates      | Iran       | RCT, Pre-post          | 70 Newborns | 32-37 weeks              | SSC            | After pre-intervention period                               | N/A                                        | 1.16                            | N/A                         | N/A                                                                                                 | N/A                | N/A                |
| Ramanathan | 2001 | Kangaroo Mother Care in very low birth weight infants                                                        | India      | RCT                    | 28 Newborns | <1500g                   | N/A            | Once eligible: N/A definition                               | Cardio-pumon.ary and temperature stability | ≥4                              | N/A                         | 1401 g, GA ≥34 weeks, mothers confidence to go home, weight gain, no medication or illness, and EBF | N/A                | N/A                |
| Reynolds   | 2013 | Parental presence and holding in the neonatal intensive care unit and associations with early neuro-behavior | USA        | Prospective Cohort     | 81 Newborns | ≤30 weeks                | SSC            | N/A                                                         | N/A                                        | N/A                             | N/A                         | N/A                                                                                                 | N/A                | N/A                |
| Roberts    | 2000 | A comparison of kangaroo mother care and conventional cuddling care                                          | Australia  | RCT                    | 30 Dyads    | ≥30 weeks, SGA           | SSC            | Once eligible: N/A definition                               | N/A                                        | 2                               | 5                           | N/A                                                                                                 | N/A                | N/A                |



| Author | Year | Title                                                                                                                 | Country  | Study design           | Sample size | Newborns Characteristics | KMC components | Onset of SSC                                                                                                                                                                          | Stability criteria for KMC initiation | Hours per day of KMC provision* | # of days of KMC provision* | Discharge criteria for Kangarooed baby | Follow-up duration | Follow-up location |
|--------|------|-----------------------------------------------------------------------------------------------------------------------|----------|------------------------|-------------|--------------------------|----------------|---------------------------------------------------------------------------------------------------------------------------------------------------------------------------------------|---------------------------------------|---------------------------------|-----------------------------|----------------------------------------|--------------------|--------------------|
| Sacks  | 2013 | Neonatal care in the home in northern rural Honduras: a qualitative study of the role of traditional birth attendants | Honduras | Focus group/ interview | N/A TBA     | N/A                      | N/A            | N/A                                                                                                                                                                                   | N/A                                   | N/A                             | N/A                         | N/A                                    | N/A                | N/A                |
| Saeedi | 2011 | effect of kangaroo care method on the pain intensity of vaccination in newborns                                       | Iran     | RCT                    | 60 Newborns | Full term, 2500-4000g    | SSC            | ≥24h after birth, ≥30 min since last feeding, 2 min before vaccination                                                                                                                | Apgar=7-11 at 1 min                   | 0.5                             | 1                           | N/A                                    | N/A                | N/A                |
| Saeidi | 2010 | Kangaroo mother care for infantile colic: A randomized clinical trial                                                 | Iran     | RCT                    | 48 Newborns | Full term, >2500g        | N/A            | At first the parents received a diary to report the initial assessment of infant for 2 days, then they were visited in clinic, and then they received another Diary for reporting KMC | Infants were term                     | ≥2                              | 7                           | N/A                                    | N/A                | N/A                |

| Author | Year | Title                                                                                                                                                | Country | Study design       | Sample size  | Newborns Characteristics | KMC components | Onset of SSC                                                    | Stability criteria for KMC initiation | Hours per day of KMC provision* | # of days of KMC provision* | Discharge criteria for Kangarooed baby | Follow-up duration | Follow-up location |
|--------|------|------------------------------------------------------------------------------------------------------------------------------------------------------|---------|--------------------|--------------|--------------------------|----------------|-----------------------------------------------------------------|---------------------------------------|---------------------------------|-----------------------------|----------------------------------------|--------------------|--------------------|
|        |      |                                                                                                                                                      |         |                    |              |                          |                | activities for 7 next days                                      |                                       |                                 |                             |                                        |                    |                    |
| Saeidi | 2011 | Use of "kangaroo care" to alleviate the intensity of vaccination pain in newborns                                                                    | Iran    | RCT                | 60 Newborns  | 2500-4000g               | SSC            | 30 min before vaccination                                       | N/A                                   | 0.5                             | 1                           | N/A                                    | N/A                | N/A                |
| Sajedi | 2007 | The effect of Kangaroo Care on physiologic responses to pain of an intramuscular injection in neonates                                               | Iran    | RCT                | 100 Newborns | 37-42 weeks, 2500-4000g  | SSC            | 10 min before injection, when infant in a quiet and alert state | Apgar $\geq 8$ at 1 min               | $\geq 0.21$                     | 1                           | N/A                                    | N/A                | N/A                |
| Sakaki | 2009 | An investigation of the risk factors for infection with Methicillin-Resistant Staphylococcus Aureus among patients in a neonatal intensive care unit | Japan   | Prospective Cohort | 923 Newborns | All ages                 | SSC            | N/A                                                             | N/A                                   | $\geq 1-2$                      | N/A                         | N/A                                    | N/A                | N/A                |

| Author    | Year | Title                                                                                                                           | Country  | Study design          | Sample size    | Newborns Characteristics         | KMC components | Onset of SSC                     | Stability criteria for KMC initiation                                                                              | Hours per day of KMC provision* | # of days of KMC provision*          | Discharge criteria for Kangarooed baby             | Follow-up duration | Follow-up location |
|-----------|------|---------------------------------------------------------------------------------------------------------------------------------|----------|-----------------------|----------------|----------------------------------|----------------|----------------------------------|--------------------------------------------------------------------------------------------------------------------|---------------------------------|--------------------------------------|----------------------------------------------------|--------------------|--------------------|
| Samra     | 2012 | The effect of kangaroo mother care on the duration of phototherapy of infants re-admitted for neonatal jaundice                 | Egypt    | Intervention          | 50 Newborns    | 35-40 weeks                      | SSC            | Once eligible:<br>N/A definition | N/A                                                                                                                | ≥3                              | Every day until phototherapy stopped | N/A                                                | N/A                | N/A                |
| Santos    | 2013 | Maternal perception of the skin to skin contact with premature infants through the kangaroo position                            | Brazil   | Focus group/interview | 12 Mothers     | Premature and LBW:N/A cutoff,    | SSC            | N/A                              | N/A                                                                                                                | N/A                             | N/A                                  | N/A                                                | N/A                | N/A                |
| Scher     | 2009 | Neurophysiologic assessment of brain maturation after an 8-week trial of skin-to-skin contact on pre-term infants               | USA      | Prospective Cohort    | 134 Newborns   | 28-32 weeks, >1000g, Full term   | SSC            | N/A                              | No encephalopathy or IVH > grade II or meningitis, or congenital brain malformations. No mothers' substance abuse. | 1.5                             | 5 days per week during 8 weeks       | N/A                                                | N/A                | N/A                |
| Schneider | 2012 | Cerebral motor function in very premature-at-birth adolescents: a brain stimulation exploration of kangaroo mother care effects | Colombia | RCT                   | 48 Adolescents | Premature: N/A cutoff, Full term | SSC, DC, FU    | Immediately after birth          | Tolerating physical manipulation, able to suck and swallowing                                                      | N/A                             | N/A                                  | Immediately after brief adaptation to KMC position | 1 year             | Health facility    |
| Shu-guang | 2012 | Influence of Kangaroo care in improving milk intake and immune status for                                                       | China    | RCT                   | 80 Newborns    | Premature: N/A cutoff            | N/A            | N/A                              | N/A                                                                                                                | N/A                             | N/A                                  | N/A                                                | 7, 14, and 28 days | N/A                |

| Author   | Year | Title                                                                                                                    | Country        | Study design                | Sample size                       | Newborns Characteristics           | KMC components | Onset of SSC                  | Stability criteria for KMC initiation | Hours per day of KMC provision* | # of days of KMC provision*             | Discharge criteria for Kangarooed baby | Follow-up duration | Follow-up location |
|----------|------|--------------------------------------------------------------------------------------------------------------------------|----------------|-----------------------------|-----------------------------------|------------------------------------|----------------|-------------------------------|---------------------------------------|---------------------------------|-----------------------------------------|----------------------------------------|--------------------|--------------------|
|          |      | premature children                                                                                                       |                |                             |                                   |                                    |                |                               |                                       |                                 |                                         |                                        |                    |                    |
| Sikorová | 2012 | Verifying the benefits of kangaroo mother care - A pilot study                                                           | Czech Republic | RCT, Focus group/ interview | 33 New-borns                      | <1800g                             | N/A            | N/A                           | N/A                                   | N/A                             | N/A                                     | N/A                                    | N/A                | N/A                |
| Silva    | 2010 | Factors which influence weaning in pre-term infant                                                                       | Brazil         | Retrospective cohort        | 89 Dyads                          | <37 weeks, <2500g                  | N/A            | N/A                           | N/A                                   | N/A                             | N/A                                     | N/A                                    | N/A                | N/A                |
| Silva    | 2008 | Perceptions and neonatal care behavior of women in a Kangaroo-mother Care Program                                        | Brazil         | Focus group/ interview      | 5 Dyads                           | Premature: N/A cutoff, <1000-1550g | SSC            | Once eligible: N/A definition | N/A                                   | ≤24                             | Depends mother's length of stay         | N/A                                    | N/A                | N/A                |
| Singh    | 2012 | Utilization of postnatal care for newborns and its association with neonatal mortality in India: an analytical appraisal | India          | Case control                | 145662 New-borns, 810204/ Mothers | All ages                           | N/A            | N/A                           | N/A                                   | N/A                             | N/A                                     | N/A                                    | N/A                | N/A                |
| Sloan    | 2008 | Community-based kangaroo mother care to prevent neonatal and infant mortality: a randomized, controlled cluster trial    | Bangladesh     | Cluster RCT                 | 4165 New-borns, 39888 Mothers     | All ages                           | SSC            | N/A                           | N/A                                   | N/A                             | data available for first 2 days of life | N/A                                    | N/A                | N/A                |



| Author | Year | Title                                                                               | Country | Study design       | Sample size  | Newborns Characteristics | KMC components | Onset of SSC                   | Stability criteria for KMC initiation                                                                                                                                   | Hours per day of KMC provision*              | # of days of KMC provision* | Discharge criteria for Kangarooed baby                                                                                                                 | Follow-up duration                                                                     | Follow-up location |
|--------|------|-------------------------------------------------------------------------------------|---------|--------------------|--------------|--------------------------|----------------|--------------------------------|-------------------------------------------------------------------------------------------------------------------------------------------------------------------------|----------------------------------------------|-----------------------------|--------------------------------------------------------------------------------------------------------------------------------------------------------|----------------------------------------------------------------------------------------|--------------------|
|        |      | ents                                                                                |         |                    |              |                          |                |                                |                                                                                                                                                                         |                                              |                             |                                                                                                                                                        |                                                                                        |                    |
| Subedi | 2009 | Kangaroo mother care for low birth weight babies: A prospective observational study | Nepal   | Prospective Cohort | 60 Newborns  | 1200-2000g               | SSC, EBF, FU   | Once eligible: N/A definition  | N/A                                                                                                                                                                     | N/A                                          | N/A                         | Weight gain $\geq 10\text{gm/kg/day}$ for $\geq 3$ consecutive days, stable and maintaining vitals, no sepsis, mothers confident caring babies at home | Weekly until 2500g                                                                     | N/A                |
| Suman  | 2008 | Kangaroo mother care for low birth weight infants: a randomized controlled trial    | India   | RCT                | 206 Newborns | <2000g                   | SSC, EBF, FU   | As soon as the baby was stable | no critically ill requiring ventilator or ionotropic support, no chromosomal or life threatening congenital anomalies, no requiring transfer, no critically ill mothers | as long as possible during the day and night | N/A                         | Weight gain of 10-15 g/kg/d for 3 consecutive days, feeding well, maintaining temperature mother confident of caring baby                              | Weekly until PMA of 40 weeks in preterm or until a weight of 2500 g in term SGA babies | Health facility    |
| Suzuki | 2013 | Effect of early skin-to-skin contact on breastfeeding                               | Japan   | Prospective cohort | 470 Dyads    | N/A                      | SSC, EBF, FU   | Immediately after birth        | N/A                                                                                                                                                                     | 1-1.5                                        | 1                           | N/A                                                                                                                                                    | 1 mon.PGA                                                                              | Home               |

| Author     | Year | Title                                                                                                                                                                            | Country | Study design                   | Sample size  | Newborns Characteristics      | KMC components | Onset of SSC                                                                                                | Stability criteria for KMC initiation    | Hours per day of KMC provision* | # of days of KMC provision* | Discharge criteria for Kangarooed baby          | Follow-up duration                                                                                                 | Follow-up location |
|------------|------|----------------------------------------------------------------------------------------------------------------------------------------------------------------------------------|---------|--------------------------------|--------------|-------------------------------|----------------|-------------------------------------------------------------------------------------------------------------|------------------------------------------|---------------------------------|-----------------------------|-------------------------------------------------|--------------------------------------------------------------------------------------------------------------------|--------------------|
| Sylla      | 2011 | Towards better care for preterm infants in Bamako, Mali                                                                                                                          | Mali    | Prospective cohort, no control | 480 Newborns | Premature: N/A cutoff, <2000g | SSC, DC, FU    | Once eligible: N/A definition                                                                               | Clinically stable (autonomous breathing) | N/A                             | N/A                         | As soon as weight gain and parents' independent | Initially twice a week, then once a week until term (40wks), then mon.till 6mo, then every 2 mon. until 12-18 mon. | Health facility    |
| Takahashi  | 2011 | Comparison of salivary cortisol, heart rate, and oxygen saturation between early skin-to-skin contact with different initiation and duration times in healthy, full-term infants | Japan   | Intervention                   | 108 Newborns | Full term                     | SSC            | Immediately (<5min) after birth in one group, after initial newborn exam (>5min after birth) in other group | N/A                                      | N/A                             | N/A                         | N/A                                             | N/A                                                                                                                | N/A                |
| Tallandini | 2006 | Kangaroo Mother Care and mother-premature infant dyadic interaction                                                                                                              | Italy   | Intervention                   | 40 Dyads     | <1800g                        | SSC            | N/A                                                                                                         | N/A                                      | ≥1                              | N/A                         | Sufficient physiological stability              | N/A                                                                                                                | N/A                |
| Tenório    | 2010 | Evaluation of physiological parameters in preterm newborns with low weight before and                                                                                            | Brazil  | Pre-post                       | 24 Newborns  | <24-36 weeks, <2500g          | N/A            | N/A                                                                                                         | N/A                                      | 0.33                            | 3                           | N/A                                             | N/A                                                                                                                | N/A                |

| Author  | Year | Title                                                                                                                  | Country  | Study design | Sample size  | Newborns Characteristics | KMC components | Onset of SSC                                                            | Stability criteria for KMC initiation | Hours per day of KMC provision* | # of days of KMC provision* | Discharge criteria for Kangarooed baby                                 | Follow-up duration                                                                          | Follow-up location |
|---------|------|------------------------------------------------------------------------------------------------------------------------|----------|--------------|--------------|--------------------------|----------------|-------------------------------------------------------------------------|---------------------------------------|---------------------------------|-----------------------------|------------------------------------------------------------------------|---------------------------------------------------------------------------------------------|--------------------|
|         |      | after application of the kangaroo mother care                                                                          |          |              |              |                          |                |                                                                         |                                       |                                 |                             |                                                                        |                                                                                             |                    |
| Tessier | 1998 | Kangaroo mother care and the bonding hypothesis                                                                        | Colombia | RCT          | 488 Newborns | <2001g                   | SSC, DC, FU    | Once adapted to extra-uterine life and able to breast-feed              | Adapted to extra-uterine life         | N/A                             | N/A                         | Weight gain $\geq 20$ g /d, $\geq 1700$ g                              | Weekly until term (40 weeks GA)                                                             | Health facility    |
| Tessier | 2009 | Kangaroo Mother Care, home environment and father involvement in the first year of life: a randomized controlled study | Colombia | RCT          | 338 Dyads    | 2001g                    | SSC, DC, FU    | Pre-mature infant adapted to extra-uterine life and able to breast-feed | The same as SSC onset criteria        | N/A                             | N/A                         | Pre-mature infant adapted to extra-uterine life and able to breastfeed | Original RCT included weekly visits until 40 wks GA, then interview/evaluation at 9-12 mon. | Health facility    |

| Author  | Year | Title                                                                                                                                                                     | Country  | Study design           | Sample size           | Newborns Characteristics            | KMC components | Onset of SSC                                                                  | Stability criteria for KMC initiation | Hours per day of KMC provision* | # of days of KMC provision* | Discharge criteria for Kangarooed baby    | Follow-up duration                                                                                                  | Follow-up location       |
|---------|------|---------------------------------------------------------------------------------------------------------------------------------------------------------------------------|----------|------------------------|-----------------------|-------------------------------------|----------------|-------------------------------------------------------------------------------|---------------------------------------|---------------------------------|-----------------------------|-------------------------------------------|---------------------------------------------------------------------------------------------------------------------|--------------------------|
| Tessier | 2003 | Kangaroo Mother Care: A method for protecting high-risk low-birth-weight and premature infants against developmental delay                                                | Colombia | RCT                    | 431 Dyads             | Premature: N/A cutoff, $\leq 1800g$ | SSC, DC, FU    | Premature infant has adapted to extra-uterine life and is able to breast-feed | The same as SSC onset criteria        | N/A                             | N/A                         | The same as SSC onset criteria            | followed daily until gaining $\geq 20g/day$ then weekly until term (40wks GA), then interview/evaluation at 12 mon. | Health facility          |
| Thukral | 2012 | Early skin-to-skin contact and breastfeeding behavior in term neonates: A randomized controlled trial                                                                     | India    | RCT                    | 41 Dyads              | Full term                           | SSC, EBF, FU   | Immediately after birth                                                       | N/A                                   | 2                               | 1                           | N/A                                       | N/A                                                                                                                 | Health facility          |
| Toma    | 2003 | Kangaroo Mother Care: the role of health care services and family networks in a successful program                                                                        | Brazil   | Focus group/ interview | 14 Mothers, 7 Fathers | Premature: N/A cutoff, 1150-2300g   | N/A            | Ranged from 3 to 39 days of life                                              | N/A                                   | N/A                             | N/A                         | Clinical stability                        | Until get 2500 g                                                                                                    | Home and health facility |
| Toma    | 2007 | Maternal perception of low birth weight babies before and following the implementation of the Kangaroo Mother Care in a public hospital, in the city of São Paulo, Brazil | Brazil   | Focus group/ interview | 41 Mothers            | $< 2000g$                           | N/A            | On mean 18 days                                                               | N/A                                   | N/A                             | N/A                         | Knowledge with breastfeeding, gain weight | 15 days after the discharge, till 6 mon. after discharge                                                            | Health facility          |







| Author | Year | Title                                                                                                                                                        | Country  | Study design | Sample size  | Newborns Characteristics | KMC components | Onset of SSC                     | Stability criteria for KMC initiation   | Hours per day of KMC provision* | # of days of KMC provision* | Discharge criteria for Kangarooed baby                                                        | Follow-up duration | Follow-up location |
|--------|------|--------------------------------------------------------------------------------------------------------------------------------------------------------------|----------|--------------|--------------|--------------------------|----------------|----------------------------------|-----------------------------------------|---------------------------------|-----------------------------|-----------------------------------------------------------------------------------------------|--------------------|--------------------|
| Worku  | 2005 | Kangaroo mother care: a randomized controlled trial on effectiveness of early kangaroo mother care for the low birth weight infants in Addis Ababa, Ethiopia | Ethiopia | RCT          | 123 Newborns | <2000g                   | SSC, EBF       | Immediately after birth          | No congenital anomalies; healthy mother | N/A                             | N/A                         | Stable temperature, stabilized cardiovascular status, ability to suck, good general condition | N/A                | N/A                |
| Xuefen | 2013 | Effect of Kangaroo care on diminishing neonatal pain during heel lancing                                                                                     | China    | RCT          | 60 Newborns  | 37-42 weeks, 2500-4000g  | N/A            | Once eligible:<br>N/A definition | N/A                                     | N/A                             | N/A                         | N/A                                                                                           | N/A                | N/A                |

bpm: beat per minute; CA: corrected Age; CHW: community health workers; DC: early discharge from facility; D/W: days/week; EBF: exclusively or near exclusively breast feeding; FU: follow up after discharge;  
HCP: health care professionals; HCW: health care worker; HR: heart rate; IV: intravenous; IVH: intra ventricular hemorrhage; KMC: kangaroo mother care; LBW: low birth weight; min: minutes; mon.: months;  
N/A: undefined or not available; NG tube: naso-gastric tube; PCA: post ceptional age; PGA: post gestational age; PMA: post menstrual age; RR: respiratory rate; SSC:skin-to-skin contact;TBA: traditional birth attendance

\* Number of hours per day and number of days of KMC provision were amount of KMC provision promoted by researchers not truly observed.

\*\* Program report
